# Supplementary material for: Cu/Pd cooperatively catalyzed tandem intramolecular anti-Markovnikov hydroarylation of unsaturated amides: facile construction of 3,4-dihydroquinolinones via borylation/intramolecular C(sp3)–C(sp2) cross coupling
Source: Royal Society of Chemistry journal article supplement (doi:10.1039/c7cc07180a), 2017-11-23
Supplement: c7cc07180a1.pdf [file c7cc07180a1.pdf]

# Supporting Information

*for*

**Cu/Pd Cooperatively Catalyzed Tandem Intramolecular anti-Markovnikov Hydroarylation of Unsaturated Amides: Facile Construction of 3,4-Dihydroquinolinones via Borylation/Intramolecular C(sp<sup>3</sup>)-C(sp<sup>2</sup>) Cross Coupling**

## Table of Contents

|                                                                                  |    |
|----------------------------------------------------------------------------------|----|
| 1. General Information .....                                                     | 3  |
| 2. Optimization of Experimental Conditions.....                                  | 4  |
| 3. General Process for the Synthesis of <b>2a</b> and <b>6a</b> .....            | 6  |
| 4. General Process for the Synthesis of <b>2m</b> and <b>2n</b> on 1.5 mmol..... | 7  |
| 5. Characterization Data for Products.....                                       | 8  |
| 6. NMR Spectroscopic Data .....                                                  | 15 |
| 7. References.....                                                               | 42 |

## 1. General Information

All reagents and solvents were purchased from Adamas Reagent, energy chemical company, J&K Scientific Ltd, Bide Pharmatech Ltd and Tansoole and used without further purification. Unless otherwise stated, all experiments were conducted in a Schlenk tube under N<sub>2</sub> atmosphere which had been oven-dried. All reagents were dry. Reactions were monitored by TLC or GC-MS analysis. Flash column chromatography was performed over silica gel (200-300 mesh).

<sup>1</sup>H NMR (in CDCl<sub>3</sub> or DMSO-d<sub>6</sub>), <sup>19</sup>F NMR (in CDCl<sub>3</sub>) and <sup>13</sup>C NMR spectra (in CDCl<sub>3</sub>) were recorded at ambient temperature using 500 MHz spectrometers (500 MHz <sup>1</sup>H, 125 MHz <sup>13</sup>C, 471 MHz <sup>19</sup>F). The data are reported as follows: chemical shift in ppm from internal tetramethylsilane on the  $\delta$  scale, multiplicity (br = broad, s = singlet, d = doublet, t = triplet, q = quartet, m = multiplet), coupling constants (Hz) and integration. High-resolution mass spectra data were obtained by peak matching.

## 2. Optimization of Experimental Conditions

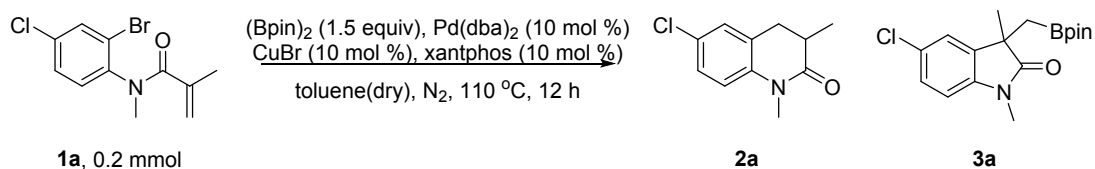

| entry | base (1.5 equiv)                | yield (%) |           |
|-------|---------------------------------|-----------|-----------|
|       |                                 | <b>2a</b> | <b>3a</b> |
| 1     | NaO <sup>t</sup> Bu             |           | 17        |
| 2     | LiO <sup>t</sup> Bu             |           | 23        |
| 3     | Cs <sub>2</sub> CO <sub>3</sub> | 41        | 5         |
| 4     | K <sub>2</sub> CO <sub>3</sub>  | 39        | 4         |
| 5     | Na <sub>2</sub> CO <sub>3</sub> | 43        | 3         |
| 6     | DBU                             | 31        | 10        |
| 7     | NaHCO <sub>3</sub>              |           | 28        |
| 8     | K <sub>3</sub> PO <sub>4</sub>  |           | 39        |
| 9     | K <sub>2</sub> HPO <sub>4</sub> | 36        | 22        |
| 10    | Li <sub>2</sub> CO <sub>3</sub> | 31        | 5         |
| 11    | NaOAc                           |           | 37        |
| 12    | NaOMe                           |           | 36        |

Reaction conditions: all reactions were performed on 0.2 mmol scale with respect to 1a; yields were determined by GC by utilizing dodecane as internal standard. The reaction mixture contained approximately 0.3% w/w water.

The method to determine the water contamination:

Instrument: Automatic Karl Fischer moisture analyzer MKC-520D, Electronic Balance AT261/1994392H2054. Method: GB/T 6283-2008.

| Reaction Mixture          | Before Reaction | Reaction Over |
|---------------------------|-----------------|---------------|
| Water Contamination (w/w) | 0.0041          | 0.0024        |

## Some incompatible substrates

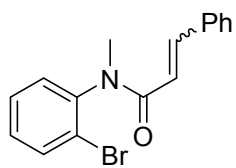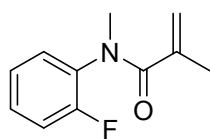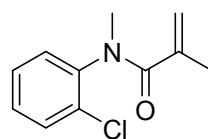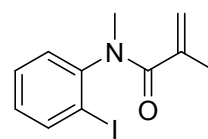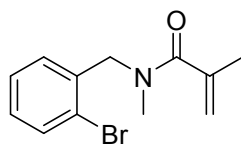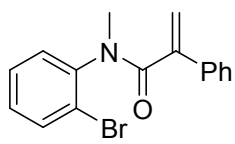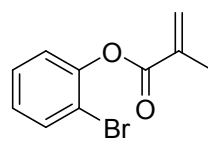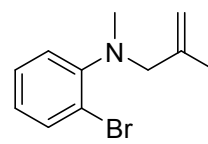

### 3. General Process for the Synthesis of 2a and 6a

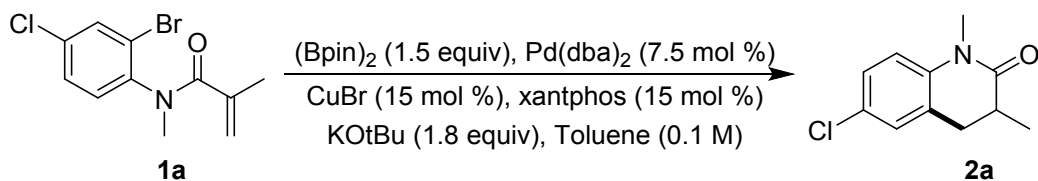

To a 25 mL Schlenk tube, under a nitrogen atmosphere, was added 0.20 mmol of unsaturated amide (**1**) followed by 0.30 mmol of (Bpin)<sub>2</sub> (1.5 equiv), 0.015 mmol of Pd(dba)<sub>2</sub> (0.075 equiv), 0.03 mmol of CuBr (0.15 equiv), 0.03 mmol of xantphos (0.15 equiv), 0.36 mmol of KO<sup>t</sup>Bu (1.8 equiv), in toluene (2 mL). The Schlenk tube was sealed and stirred at 110 °C for further 12 h. Then, the reaction mixture was washed by water, and extracted with EA. Then the organic layers were dried with Na<sub>2</sub>SO<sub>4</sub>, and concentrated to dryness. The crude product was purified by silica gel chromatography (silica gel, PE: EA = 10:1 – 6:1, v/v) to afford the product **2** (31.7 mg, 75%) as a light yellow oil.

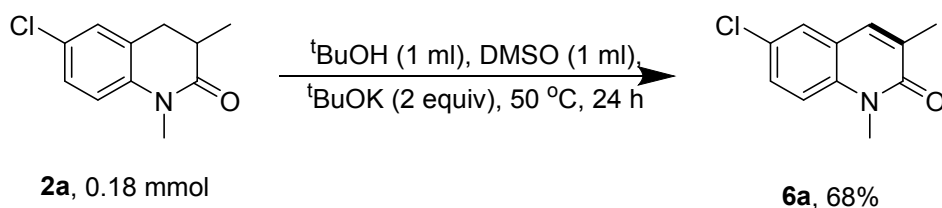

To a 25 mL tube was added 0.18 mmol of 6-chloro-1,3-dimethyl-3,4-dihydroquinolin-2(1*H*)-one (**2a**) and 0.36 mmol of KO<sup>t</sup>Bu (2.0 equiv), in DMSO (1 mL) and tert butanol (1mL). The tube was sealed and stirred at 50 °C for further 24 h under air. Then, the reaction mixture was extracted with EA/H<sub>2</sub>O. Then the organic layers were dried with Na<sub>2</sub>SO<sub>4</sub>, and concentrated to dryness. The crude product was purified by silica gel chromatography (silica gel, PE: EA = 10:1 – 6:1, v/v) to afford the product **6a** (25.5 mg, 68%) as a light yellow solid.

#### 4. General Process for the Synthesis of **2m** and **2n** on 1.5 mmol

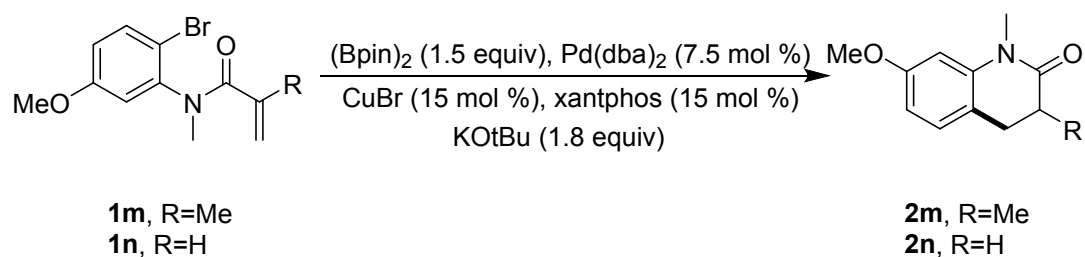

To a 25 mL Schlenk tube, under a nitrogen atmosphere, was added 1.50 mmol of unsaturated amide (**1m** or **1n**) followed by 2.3 mmol of (Bpin)<sub>2</sub> (1.5 equiv), 0.225 mmol of CuBr (0.15 equiv), 0.225 mmol of xantphos (0.15 equiv), 2.7 mmol of KOtBu (1.8 equiv), in toluene (8 mL). The Schlenk tube was sealed and stirred at 110 °C for further 10 min, subsequently, 0.113 mmol of Pd(dba)<sub>2</sub> (0.075 equiv) in 2 ml toluene was added with syringe, and stirred overnight at the same temperature. Then, the reaction mixture was cooled to room temperature, washed by water, and extracted with EA. Then the organic layers were dried with Na<sub>2</sub>SO<sub>4</sub>, and concentrated to dryness. The crude product was purified by silica gel chromatography (silica gel, PE: EA = 10:1 – 6:1, v/v) to afford the product (**2m**, 191 mg, 60 %; **2n**, 205 mg, 70%) as a light yellow solid.

Caution: The reactants were added by order.

## 5. Characterization Data for Products

### 6-Chloro-1,3-dimethyl-3,4-dihydroquinolin-2(1*H*)-one (2a)<sup>[1]</sup>

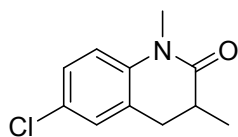

The reaction was performed following the general procedure. The residue was purified by flash column chromatograph (silica gel, PE: EA =10:1 - 6:1, v/v) to give the product as a yellow oil (31.7 mg, 75%). <sup>1</sup>H NMR (500 MHz, DMSO)  $\delta$  7.31 – 7.27 (m, 2H), 7.09 – 7.06 (m, 1H), 3.23 (s, 3H), 2.92 (dd,  $J$  = 15.3, 5.4 Hz, 1H), 2.64 (dd,  $J$  = 15.2, 11.8 Hz, 1H), 2.55 (dt,  $J$  = 12.6, 6.4 Hz, 1H), 1.11 (d,  $J$  = 6.8 Hz, 3H). <sup>13</sup>C NMR (125 MHz, CDCl<sub>3</sub>)  $\delta$  172.8, 139.0, 127.8, 127.7, 127.4, 127.2, 115.6, 35.2, 31.0, 29.9, 15.6.

### 6-Fluoro-1,3-dimethyl-3,4-dihydroquinolin-2(1*H*)-one (2b)

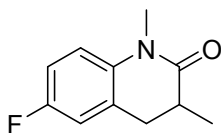

The reaction was performed following the general procedure. The residue was purified by flash column chromatograph (silica gel, PE: EA =10:1 - 6:1, v/v) to give the product as a yellow oil (34.7 mg, 90%). <sup>1</sup>H NMR (500 MHz, DMSO)  $\delta$  7.12 – 7.05 (m, 3H), 3.23 (s, 3H), 2.91 (dd,  $J$  = 15.4, 5.5 Hz, 1H), 2.64 (dd,  $J$  = 15.3, 11.7 Hz, 1H), 2.53 (dt,  $J$  = 14.8, 4.4 Hz, 1H), 1.11 (d,  $J$  = 6.8 Hz, 3H). <sup>13</sup>C NMR (125 MHz, CDCl<sub>3</sub>)  $\delta$  172.7, 158.3 (d,  $J$  = 240.9 Hz), 136.6 (d,  $J$  = 2.5 Hz), 127.7 (d,  $J$  = 7.6 Hz), 115.5 (d,  $J$  = 8.2 Hz), 114.9 (d,  $J$  = 22.8 Hz), 113.5 (d,  $J$  = 22.1 Hz), 35.2, 33.2, 30.0, 15.6. <sup>19</sup>F NMR (471 MHz, CDCl<sub>3</sub>)  $\delta$  -121.0. HRMS (ESI,  $m/z$ ) calcd for C<sub>11</sub>H<sub>13</sub>FNO [M+H]<sup>+</sup>: 194.0976; found: 194.0978.

### 7-Fluoro-1,3-dimethyl-3,4-dihydroquinolin-2(1*H*)-one (2c)

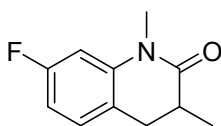

The reaction was performed following the general procedure. The residue was purified by flash column chromatograph (silica gel, PE: EA =10:1 - 6:1, v/v) to give the product as a yellow oil (23.5 mg, 61%). <sup>1</sup>H NMR (500 MHz, DMSO)  $\delta$  7.21 (dd,  $J$  = 7.8, 6.9 Hz, 1H), 6.96 (dd,  $J$  = 11.3, 2.5 Hz, 1H), 6.81 (td,  $J$  = 8.5, 2.5 Hz, 1H), 3.23 (s, 3H), 2.90 (dd,  $J$  = 14.5, 4.9 Hz, 1H), 2.56 (ddd,  $J$  = 19.1, 13.1, 9.2 Hz, 2H), 1.11 (d,  $J$  = 6.6 Hz, 3H). <sup>13</sup>C NMR (125 MHz, CDCl<sub>3</sub>)  $\delta$  173.0, 162.2 (d,  $J$  = 241.6 Hz), 141.7 (d,  $J$  = 10.1 Hz), 128.7 (d,  $J$  = 9.3 Hz), 121.1 (d,  $J$  = 3.1 Hz), 108.7 (d,  $J$  = 21.0 Hz), 102.5 (d,  $J$  = 26.5 Hz), 35.5, 32.6, 29.8, 15.6. <sup>19</sup>F NMR (471 MHz, CDCl<sub>3</sub>)  $\delta$  -114.2. HRMS (ESI,  $m/z$ ) calcd for C<sub>11</sub>H<sub>13</sub>FNO [M+H]<sup>+</sup>: 194.0976; found: 194.0976.

### 1,3-Dimethyl-7-(trifluoromethyl)-3,4-dihydroquinolin-2(1*H*)-one (2d)

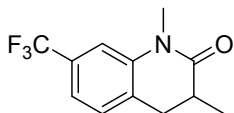

The reaction was performed following the general procedure. The residue was purified by flash column chromatograph (silica gel, PE: EA =10:1 - 6:1, v/v) to give the



product as a yellow solid (34.1 mg, 70%, mp: 78.4-79.6 °C). <sup>1</sup>H NMR (500 MHz, DMSO) δ 7.44 (d, *J* = 7.7 Hz, 1H), 7.36 (d, *J* = 7.8 Hz, 1H), 7.31 (s, 1H), 3.30 (s, 3H), 3.07 – 2.99 (m, 1H), 2.77 – 2.69 (m, 1H), 2.63 – 2.55 (m, 1H), 1.13 (d, *J* = 6.9 Hz, 3H). <sup>13</sup>C NMR (125 MHz, CDCl<sub>3</sub>) δ 172.8, 140.9, 129.9 (d, *J* = 32.3 Hz), 129.5 (d, *J* = 0.9 Hz), 128.2, 124.0 (d, *J* = 270.5 Hz), 119.4 (q, *J* = 3.7 Hz), 111.1 (q, *J* = 3.7 Hz), 35.1, 33.1, 29.9, 15.6. <sup>19</sup>F NMR (471 MHz, CDCl<sub>3</sub>) δ -62.5. HRMS (ESI, *m/z*) calcd for C<sub>12</sub>H<sub>13</sub>F<sub>3</sub>NO [M+H]<sup>+</sup>: 244.0944; found: 244.0944.

#### 1-Ethyl-3-methyl-7-(trifluoromethyl)-3,4-dihydroquinolin-2(1H)-one (2e)

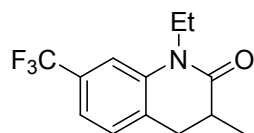

The reaction was performed following the general procedure. The residue was purified by flash column chromatograph (silica gel, PE: EA =10:1 - 6:1, v/v) to give the product as a yellow solid (31.9 mg, 62%, mp: 52.9-53.3 °C). <sup>1</sup>H NMR (500 MHz, DMSO) δ 7.59 (d, *J* = 7.0 Hz, 2H), 7.29 (d, *J* = 9.2 Hz, 1H), 4.02 – 3.84 (m, 2H), 3.02 (dd, *J* = 15.4, 5.5 Hz, 1H), 2.70 (dd, *J* = 15.3, 12.0 Hz, 1H), 2.63 – 2.55 (m, 1H), 1.12 (dt, *J* = 7.1, 3.7 Hz, 6H). <sup>13</sup>C NMR (125 MHz, CDCl<sub>3</sub>) δ 172.2, 139.9, 130.1, 129.8 (d, *J* = 7.1 Hz), 128.5, 124.0 (d, *J* = 271.3 Hz), 119.2 (q, *J* = 3.9 Hz), 111.0 (q, *J* = 3.9 Hz), 37.7, 35.1, 33.3, 15.5, 12.6. <sup>19</sup>F NMR (471 MHz, CDCl<sub>3</sub>) δ -62.5. HRMS (ESI, *m/z*) calcd for C<sub>13</sub>H<sub>15</sub>F<sub>3</sub>NO [M+H]<sup>+</sup>: 258.1100; found: 258.1101.

#### 1-Ethyl-3-methyl-6-(trifluoromethyl)-3,4-dihydroquinolin-2(1H)-one (2f)

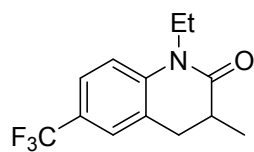

The reaction was performed following the general procedure. The residue was purified by flash column chromatograph (silica gel, PE: EA =10:1 - 6:1, v/v) to give the product as a light yellow solid (30.8 mg, 60%, mp: 49.1-49.7 °C). <sup>1</sup>H NMR (500 MHz, DMSO) δ 7.59 (d, *J* = 5.7 Hz, 2H), 7.31 – 7.27 (m, 1H), 4.02 – 3.83 (m, 2H), 3.02 (dd, *J* = 15.4, 5.4 Hz, 1H), 2.70 (dd, *J* = 15.2, 12.1 Hz, 1H), 2.64 – 2.55 (m, 1H), 1.12 (dt, *J* = 7.0, 3.7 Hz, 6H). <sup>13</sup>C NMR (125 MHz, CDCl<sub>3</sub>) δ 172.4, 142.2, 126.3, δ 125.2, 125.1 (q, *J* = 3.6 Hz), 124.7 (q, *J* = 3.9 Hz), 124.0 (dd, *J* = 111.6, 78.8 Hz), 114.2, 37.7, 35.1, 33.2, 15.5, 12.6. <sup>19</sup>F NMR (471 MHz, CDCl<sub>3</sub>) δ -61.9. HRMS (ESI, *m/z*) calcd for C<sub>13</sub>H<sub>15</sub>F<sub>3</sub>NO [M+H]<sup>+</sup>: 258.1100; found: 258.1103.

#### 1,3-Dimethyl-6-(trifluoromethoxy)-3,4-dihydroquinolin-2(1H)-one (2g)

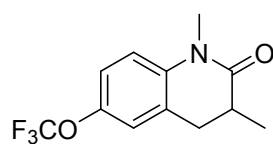

The reaction was performed following the general procedure. The residue was purified by flash column chromatograph (silica gel, PE: EA =10:1 - 6:1, v/v) to give the product as a light yellow oil (38.3 mg, 74%). <sup>1</sup>H NMR (500 MHz, DMSO) δ 7.25 (d, *J* = 9.1 Hz, 2H), 7.15 (d, *J* = 8.5 Hz, 1H), 3.26 (s, 3H), 2.96 (dd, *J* = 15.4, 5.5 Hz, 1H), 2.68 (dd, *J* = 15.3, 12.1 Hz, 1H), 2.61 – 2.52 (m, 1H), 1.12 (d, *J* = 6.8 Hz, 3H). <sup>13</sup>C NMR (125 MHz, CDCl<sub>3</sub>) δ 172.8, 144.1 (dd, *J* = 3.7, 1.9 Hz), 139.1, 127.4, 120.5 (q, *J* = 255.0 Hz), 119.9, 117.4, 115.3, 35.1, 33.1,

30.0, 15.6.  $^{19}\text{F}$  NMR (471 MHz,  $\text{CDCl}_3$ )  $\delta$  -58.2. HRMS (ESI,  $m/z$ ) calcd for  $\text{C}_{12}\text{H}_{13}\text{F}_3\text{NO}_2$   $[\text{M}+\text{H}]^+$ : 260.0893; found: 260.0893.

### 1,3-Dimethyl-2-oxo-1,2,3,4-tetrahydroquinoline-6-carbonitrile (2h)

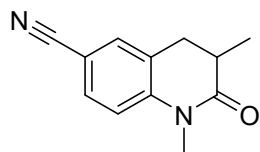

The reaction was performed following the general procedure. The residue was purified by flash column chromatograph (silica gel, PE: EA =10:1 - 5:1, v/v) to give the product as a light yellow oil (13.5 mg, 32%).  $^1\text{H}$  NMR (500 MHz, DMSO)  $\delta$  7.74 (dd,  $J$  = 8.4, 1.9 Hz, 1H), 7.69 (s, 1H), 7.23 (d,  $J$  = 8.5 Hz, 1H), 3.27 (s, 3H), 2.98 (dd,  $J$  = 15.3, 5.4 Hz, 1H), 2.70 (dd,  $J$  = 15.2, 12.1 Hz, 1H), 2.65 – 2.56 (m, 1H), 1.13 (d,  $J$  = 6.7 Hz, 3H).  $^{13}\text{C}$  NMR (125 MHz,  $\text{CDCl}_3$ )  $\delta$  172.8, 144.1, 132.0, 131.2, 126.6, 118.8, 114.8, 105.7, 35.0, 32.8, 29.9, 15.6. HRMS (EI,  $m/z$ ) calcd for  $\text{C}_{12}\text{H}_{12}\text{N}_2\text{O}$   $[\text{M}+\text{H}]^+$ : 200.0950; found: 200.0956.

### 6-Isopropyl-1,3-dimethyl-3,4-dihydroquinolin-2(1H)-one (2i)

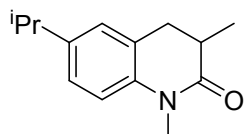

The reaction was performed following the general procedure. The residue was purified by flash column chromatograph (silica gel, PE: EA =10:1 - 5:1, v/v) to give the product as a light yellow oil (40 mg, 92%).  $^1\text{H}$  NMR (500 MHz,  $\text{CDCl}_3$ )  $\delta$  7.11 (dd,  $J$  = 8.3, 2.0 Hz, 1H), 7.02 (d,  $J$  = 1.6 Hz, 1H), 6.89 (d,  $J$  = 8.3 Hz, 1H), 3.34 (s, 3H), 2.93 – 2.82 (m, 2H), 2.63 (ddt,  $J$  = 13.5, 11.9, 9.0 Hz, 2H), 1.27 – 1.23 (m, 9H).  $^{13}\text{C}$  NMR (125 MHz,  $\text{CDCl}_3$ )  $\delta$  173.1, 143.3, 138.2, 125.9, 125.6, 125.0, 114.3, 35.5, 33.4, 33.3, 29.7, 24.02, 24.03, 15.7. HRMS (ESI,  $m/z$ ) calcd for  $\text{C}_{14}\text{H}_{20}\text{NO}$   $[\text{M}+\text{H}]^+$ : 218.1539; found: 218.1540.

### 1,3,6-Trimethyl-3,4-dihydroquinolin-2(1H)-one (2j)<sup>[1]</sup>

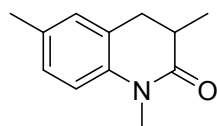

The reaction was performed following the general procedure. The residue was purified by flash column chromatograph (silica gel, PE: EA =10:1 - 6:1, v/v) to give the product as a light yellow oil (28.2 mg, 74%).  $^1\text{H}$  NMR (500 MHz, DMSO)  $\delta$  7.05 (d,  $J$  = 8.2 Hz, 1H), 7.01 (s, 1H), 6.95 (d,  $J$  = 8.2 Hz, 1H), 3.22 (s, 3H), 2.86 (dd,  $J$  = 15.0, 5.3 Hz, 1H), 2.59 (dd,  $J$  = 14.7, 11.8 Hz, 1H), 2.54 – 2.46 (m, 2H), 2.24 (s, 3H), 1.10 (d,  $J$  = 6.8 Hz, 3H).  $^{13}\text{C}$  NMR (125 MHz,  $\text{CDCl}_3$ )  $\delta$  173.0, 138.0, 132.1, 128.6, 127.7, 125.5, 114.3, 35.5, 33.3, 29.8, 20.5, 15.7.

### 1,3,7-Trimethyl-3,4-dihydroquinolin-2(1H)-one (2k)

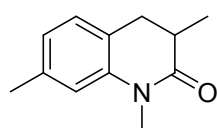

The reaction was performed following the general procedure. The residue was purified by flash column chromatograph (silica gel, PE: EA =10:1 - 6:1, v/v) to give the product as

a light yellow oil (26.1 mg, 70%).  $^1\text{H}$  NMR (500 MHz, DMSO)  $\delta$  7.07 (d,  $J$  = 7.5 Hz, 1H), 6.90 (s, 1H), 6.81 (dd,  $J$  = 7.5, 0.7 Hz, 1H), 3.24 (s, 3H), 2.85 (dd,  $J$  = 14.8, 5.2 Hz, 1H), 2.60 – 2.54 (m, 1H), 2.53 – 2.45 (m, 1H), 2.30 (s, 3H), 1.10 (d,  $J$  = 6.7 Hz, 3H).  $^{13}\text{C}$  NMR (125 MHz,  $\text{CDCl}_3$ )  $\delta$  173.3, 140.2, 137.1, 127.6, 123.2, 122.7, 115.3, 35.6, 32.9, 29.8, 21.5, 15.7. HRMS (ESI,  $m/z$ ) calcd for  $\text{C}_{12}\text{H}_{16}\text{NO}$   $[\text{M}+\text{H}]^+$ : 190.1226; found: 190.1226.

### 1,3,5-Trimethyl-3,4-dihydroquinolin-2(1H)-one (2l)

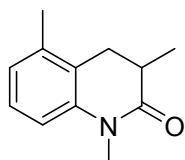

The reaction was performed following the general procedure. The residue was purified by flash column chromatograph (silica gel, PE: EA =10:1 - 6:1, v/v) to give the product as a light yellow oil (22.7 mg, 60%).  $^1\text{H}$  NMR (500 MHz, DMSO)  $\delta$  7.14 (t,  $J$  = 7.8 Hz, 1H), 6.90 (dd,  $J$  = 14.2, 7.8 Hz, 2H), 3.23 (s, 3H), 2.98 – 2.89 (m, 1H), 2.53 – 2.43 (m, 2H), 2.25 (s, 3H), 1.14 (d,  $J$  = 6.3 Hz, 3H).  $^{13}\text{C}$  NMR (126 MHz,  $\text{CDCl}_3$ )  $\delta$  173.1, 140.5, 135.5, 126.8, 124.7, 124.3, 112.6, 35.0, 30.1, 29.6, 19.5, 15.8. HRMS (ESI,  $m/z$ ) calcd for  $\text{C}_{12}\text{H}_{16}\text{NO}$   $[\text{M}+\text{H}]^+$ : 190.1226; found: 190.1228.

### 7-Methoxy-1,3-dimethyl-3,4-dihydroquinolin-2(1H)-one (2m) <sup>[1]</sup>

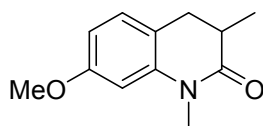

The reaction was performed following the general procedure. The residue was purified by flash column chromatograph (silica gel, PE: EA =10:1 - 4:1, v/v) to give the product as a light yellow solid (26 mg, 63%, mp: 78.8-79.6 °C).  $^1\text{H}$  NMR (500 MHz,  $\text{CDCl}_3$ )  $\delta$  7.05 (d,  $J$  = 8.8 Hz, 1H), 6.55 – 6.52 (m, 2H), 3.81 (s, 3H), 3.33 (s, 3H), 2.90 – 2.83 (m, 1H), 2.65 – 2.56 (m, 2H), 1.24 (d,  $J$  = 6.5 Hz, 3H).  $^{13}\text{C}$  NMR (125 MHz,  $\text{CDCl}_3$ )  $\delta$  173.4, 159.1, 141.4, 128.3, 117.9, 106.4, 102.2, 55.4, 35.8, 32.5, 29.8, 15.7.

### 7-Methoxy-1-methyl-3,4-dihydroquinolin-2(1H)-one (2n) <sup>[2]</sup>

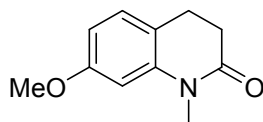

The reaction was performed following the general procedure. The residue was purified by flash column chromatograph (silica gel, PE: EA =10:1 - 4:1, v/v) to give the product as a light yellow solid (29.5 mg, 77%, mp: 77.1-78.2 °C).  $^1\text{H}$  NMR (500 MHz,  $\text{CDCl}_3$ )  $\delta$  7.06 (d,  $J$  = 7.8 Hz, 1H), 6.56 – 6.52 (m, 2H), 3.81 (s, 3H), 3.32 (s, 3H), 2.85 – 2.81 (m, 2H), 2.62 (dd,  $J$  = 8.4, 6.3 Hz, 2H).  $^{13}\text{C}$  NMR (125 MHz,  $\text{CDCl}_3$ )  $\delta$  170.6, 159.1, 141.6, 128.1, 118.4, 106.4, 102.4, 55.4, 32.0, 29.5, 24.5.

### 1-Ethyl-3-methyl-3,4-dihydroquinolin-2(1H)-one (2o) <sup>[1]</sup>

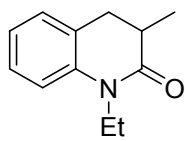

The reaction was performed following the general procedure. The residue was purified by flash column chromatograph (silica gel, PE: EA =10:1 - 6:1, v/v) to give the product as a light yellow oil (31.9 mg, 85%). <sup>1</sup>H NMR (500 MHz, DMSO)  $\delta$  7.27 – 7.22 (m, 1H), 7.20 (d,  $J$  = 7.3 Hz, 1H), 7.10 (d,  $J$  = 7.8 Hz, 1H), 6.98 (td,  $J$  = 7.4, 1.0 Hz, 1H), 3.98 – 3.80 (m, 2H), 2.88 (dd,  $J$  = 15.1, 5.3 Hz, 1H), 2.61 (dd,  $J$  = 15.0, 11.9 Hz, 1H), 2.56 – 2.47 (m, 1H), 1.11 (dt,  $J$  = 7.1, 3.7 Hz, 6H). <sup>13</sup>C NMR (125 MHz, CDCl<sub>3</sub>)  $\delta$  172.6, 139.4, 128.1, 127.4, 126.0, 122.5, 114.4, 37.6, 35.5, 33.5, 15.6, 12.8.

### 1-Benzyl-3-methyl-3,4-dihydroquinolin-2(1H)-one (2p) <sup>[1]</sup>

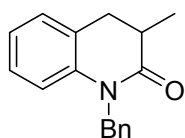

The reaction was performed following the general procedure. The residue was purified by flash column chromatograph (silica gel, PE: EA =10:1 - 6:1, v/v) to give the product as a light yellow oil (35.4 mg, 70%). <sup>1</sup>H NMR (500 MHz, DMSO)  $\delta$  7.30 (t,  $J$  = 7.6 Hz, 2H), 7.20 (d,  $J$  = 7.9 Hz, 4H), 7.14 – 7.08 (m, 1H), 6.95 (t,  $J$  = 7.2 Hz, 1H), 6.89 (d,  $J$  = 8.1 Hz, 1H), 5.14 (dd,  $J$  = 60.3, 16.4 Hz, 2H), 3.04 – 2.93 (m, 1H), 2.80 – 2.67 (m, 2H), 1.20 (d,  $J$  = 6.1 Hz, 3H). <sup>13</sup>C NMR (125 MHz, CDCl<sub>3</sub>)  $\delta$  173.3, 139.7, 137.2, 128.7, 128.0, 127.4, 127.0, 126.3, 125.8, 122.8, 115.3, 46.5, 35.6, 33.5, 15.7.

### 1-Methyl-3,4-dihydroquinolin-2(1H)-one (2q) <sup>[3]</sup>

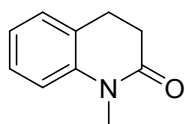

The reaction was performed following the general procedure. The residue was purified by flash column chromatograph (silica gel, PE: EA =10:1 - 6:1, v/v) to give the product as a light yellow oil (26.4 mg, 83%). <sup>1</sup>H NMR (500 MHz, DMSO)  $\delta$  7.25 (td,  $J$  = 8.1, 1.6 Hz, 1H), 7.21 (dd,  $J$  = 7.3, 1.0 Hz, 1H), 7.10 – 7.05 (m, 1H), 7.00 (td,  $J$  = 7.4, 1.0 Hz, 1H), 3.24 (s, 3H), 2.88 – 2.81 (m, 2H), 2.52 (dd,  $J$  = 8.4, 6.5 Hz, 2H). <sup>13</sup>C NMR (125 MHz, CDCl<sub>3</sub>)  $\delta$  170.5, 140.6, 127.7, 127.4, 126.2, 122.7, 114.6, 31.7, 29.5, 25.3.

### 1,3-Dimethyl-3,4-dihydroquinolin-2(1H)-one (2r) <sup>[1]</sup>

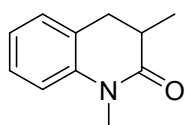

The reaction was performed following the general procedure. The residue was purified by flash column chromatograph (silica gel, PE: EA =10:1 - 6:1, v/v) to give the product as

a light yellow oil (33 mg, 94%).  $^1\text{H}$  NMR (500 MHz,  $\text{CDCl}_3$ )  $\delta$  7.28 – 7.24 (m, 1H), 7.16 (d,  $J$  = 7.3 Hz, 1H), 7.01 (td,  $J$  = 7.4, 0.9 Hz, 1H), 6.97 (d,  $J$  = 8.1 Hz, 1H), 3.36 (s, 3H), 2.93 (dd,  $J$  = 14.8, 5.1 Hz, 1H), 2.70 (dd,  $J$  = 14.7, 11.2 Hz, 1H), 2.62 (ddd,  $J$  = 13.6, 9.2, 6.0 Hz, 1H), 1.26 (d,  $J$  = 6.7 Hz, 3H).  $^{13}\text{C}$  NMR (125 MHz,  $\text{CDCl}_3$ )  $\delta$  173.3, 140.4, 127.9, 127.4, 125.8, 122.7, 114.5, 35.5, 33.3, 29.8, 15.7.

### 3-Benzyl-1-methyl-3,4-dihydroquinolin-2(1H)-one (2s)

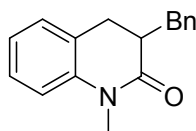

The reaction was performed following the general procedure. The residue was purified by flash column chromatograph (silica gel, PE: EA =10:1 - 6:1, v/v) to give the product as a light yellow oil (20 mg, 40%) with **4s** of 9% (determined by  $^1\text{H}$  NMR).  $^1\text{H}$  NMR (500 MHz,  $\text{CDCl}_3$ )  $\delta$  7.33 – 7.28 (m, 2H), 7.28 – 7.21 (m, 2H), 7.17 (d,  $J$  = 7.1 Hz, 2H), 7.07 (t,  $J$  = 5.3 Hz, 1H), 7.01 (ddd,  $J$  = 8.1, 6.5, 2.8 Hz, 2H), 3.40 (s, 3H), 3.31 (dd,  $J$  = 13.7, 3.9 Hz, 1H), 2.81 (dt,  $J$  = 9.7, 5.4 Hz, 2H), 2.62 – 2.52 (m, 2H).  $^{13}\text{C}$  NMR (125 MHz,  $\text{CDCl}_3$ )  $\delta$  172.1, 140.2, 139.1, 129.2, 128.4, 128.2, 127.4, 126.3, 125.1, 122.9, 114.4, 42.4, 35.5, 29.9, 29.3. HRMS (ESI,  $m/z$ ) calcd for  $\text{C}_{17}\text{H}_{18}\text{NO}$   $[\text{M}+\text{H}]^+$ : 252.1383; found: 252.1384.

### 5-Chloro-1,3-dimethyl-3-((4,4,5,5-tetramethyl-1,3,2-dioxaborolan-2-yl)methyl)indolin-2-one (3a) <sup>[4]</sup>

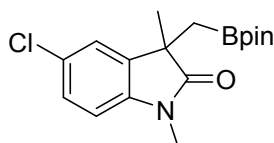

The reaction was performed following the general procedure but without CuBr and ligand. The residue was purified by flash column chromatograph (silica gel, PE: EA =8:1 - 5:1, v/v) to give the product as a light yellow solid (48 mg, 71%).  $^1\text{H}$  NMR (500 MHz, DMSO)  $\delta$  7.43 (d,  $J$  = 2.0 Hz, 1H), 7.29 (dd,  $J$  = 8.3, 2.1 Hz, 1H), 6.98 (d,  $J$  = 8.3 Hz, 1H), 3.09 (s, 3H), 1.32 – 1.16 (m, 3+2H), 0.96 (s, 6H), 0.90 (s, 6H).  $^{13}\text{C}$  NMR (125 MHz,  $\text{CDCl}_3$ )  $\delta$  181.2, 141.9, 137.5, 127.5, 127.3, 123.4, 108.5, 83.2, 45.7, 26.3, 25.2, 25.0, 24.7, 24.4.

### 5-Chloro-1,3,3-trimethylindolin-2-one (4a) <sup>[4]</sup>

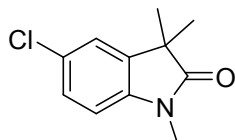

The reaction was performed following the general procedure but without CuBr and ligand. The residue was purified by flash column chromatograph (silica gel, PE: EA =8:1 - 5:1, v/v) to give the product as a light yellow solid (7.8 mg, 18%).  $^1\text{H}$  NMR (500 MHz, DMSO)  $\delta$  7.49 (d,  $J$  = 2.1 Hz, 1H), 7.32 (dd,  $J$  = 8.3, 2.2 Hz, 1H), 7.03 (d,  $J$  = 8.3 Hz, 1H), 3.12 (s, 3H), 1.27 (s, 6H).  $^{13}\text{C}$  NMR (125 MHz,  $\text{CDCl}_3$ )  $\delta$  180.8, 141.2, 137.4, 127.8, 127.5, 122.9, 108.9, 44.4, 26.3, 24.2.

***N*-(2-bromo-4-chlorophenyl)-*N*,2-dimethyl-3-(4,4,5,5-tetramethyl-1,3,2-dioxaborolan-2-yl)propanamide (5a)** <sup>[5]</sup>

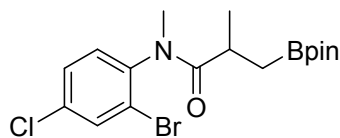

The reaction was performed following the general procedure but without Pd salt. The residue was purified by flash column chromatograph (silica gel, PE: EA =8:1 - 5:1, v/v) to give the product as a colorless liquid (55 mg, 66%). <sup>1</sup>H NMR (500 MHz, CDCl<sub>3</sub>) δ 7.67 (d, *J* = 2.2 Hz, 1H), 7.44 – 7.20 (m, 2H), 3.13 (d, *J* = 2.2 Hz, 3H), 2.47 – 2.35 (m, 1H), 1.21 (d, *J* = 10.3 Hz, 12H), 1.10 – 1.05 (m, 1H), 1.03 (d, *J* = 6.8 Hz, 3H), 0.96 – 0.78 (m, 1H). <sup>13</sup>C NMR (125 MHz, CDCl<sub>3</sub>) δ 177.4, 141.8, 141.6\*, 134.5\*, 134.4, 133.5\*, 133.4, 131.2, 130.5\*, 129.0\*, 128.9, 124.3\*, 123.8, 83.0, 82.8\*, 36.1\*, 36.0, 33.5\*, 32.9, 24.9, 24.8\*, 24.7, 24.6\*, 19.9, 19.4\*.

**6-chloro-1,3-dimethyl-3,4-dihydroquinolin-2(1*H*)-one-3-*d* (D-2a)**

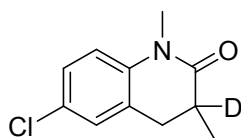

The reaction was performed following the general procedure but with additional 28 equiv D<sub>3</sub>COD. The residue was purified by flash column chromatograph (silica gel, PE: EA =8:1 - 5:1, v/v) to give the product as a colorless liquid (30 mg, 71%). <sup>1</sup>H NMR (500 MHz, CDCl<sub>3</sub>) δ 7.20 (dd, *J* = 8.6, 2.3 Hz, 1H), 7.15 – 7.12 (m, 1H), 6.87 (d, *J* = 8.6 Hz, 1H), 3.32 (s, 3H), 2.89 (dd, *J* = 13.1, 2.6 Hz, 1H), 2.69 – 2.56 (m, 1.65H), 1.26 – 1.22 (m, 3H).

**6-Chloro-1,3-dimethylquinolin-2(1*H*)-one (6a)** <sup>[6]</sup>

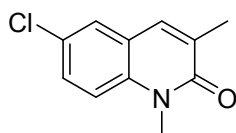

The reaction was performed following the general procedure for **6a**. The residue was purified by flash column chromatograph (silica gel, PE: EA =10:1 - 6:1, v/v) to give the product as a light yellow solid (25 mg, 68%, mp: 61.2-62.3 °C). <sup>1</sup>H NMR (500 MHz, CDCl<sub>3</sub>) δ 7.45 (dt, *J* = 8.9, 2.3 Hz, 3H), 7.26 (d, *J* = 8.9 Hz, 1H), 3.72 (s, 3H), 2.26 (d, *J* = 1.1 Hz, 3H). <sup>13</sup>C NMR (125 MHz, CDCl<sub>3</sub>) δ 162.5, 137.6, 134.4, 131.6, 129.2, 127.3, 126.8, 121.7, 115.3, 29.9, 17.9.

## 6. NMR Spectroscopic Data

### 6-Chloro-1,3-dimethyl-3,4-dihydroquinolin-2(1H)-one (2a)

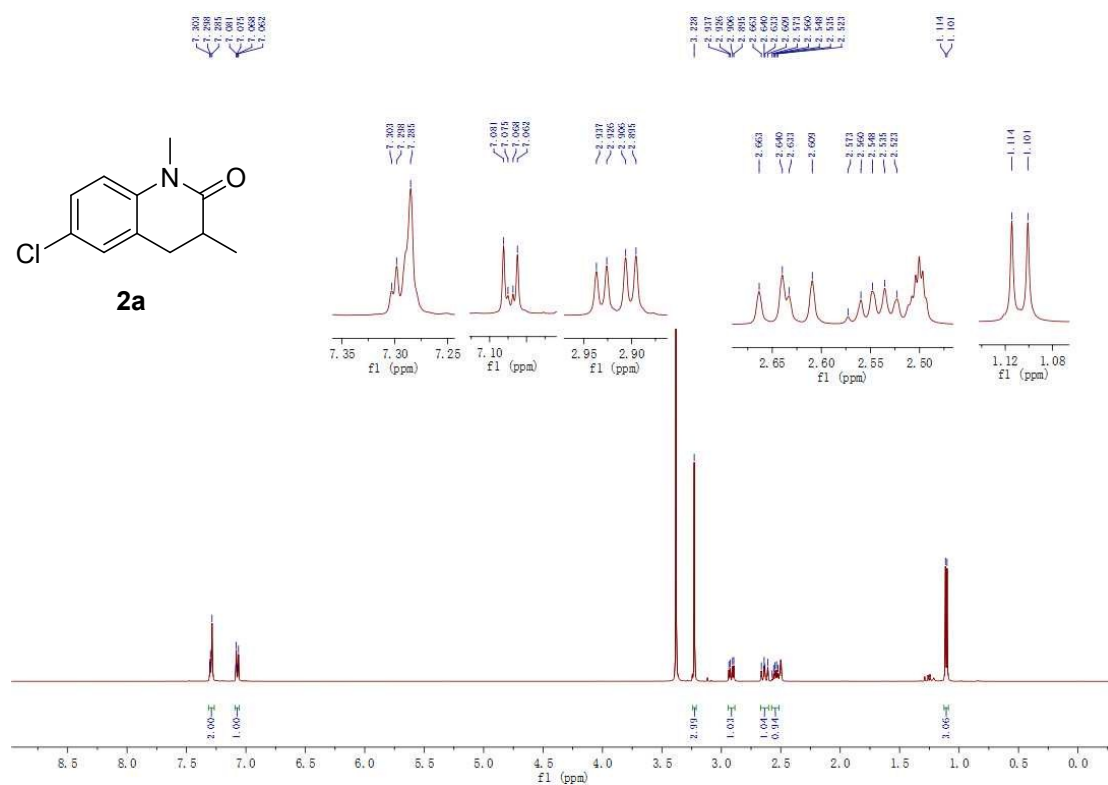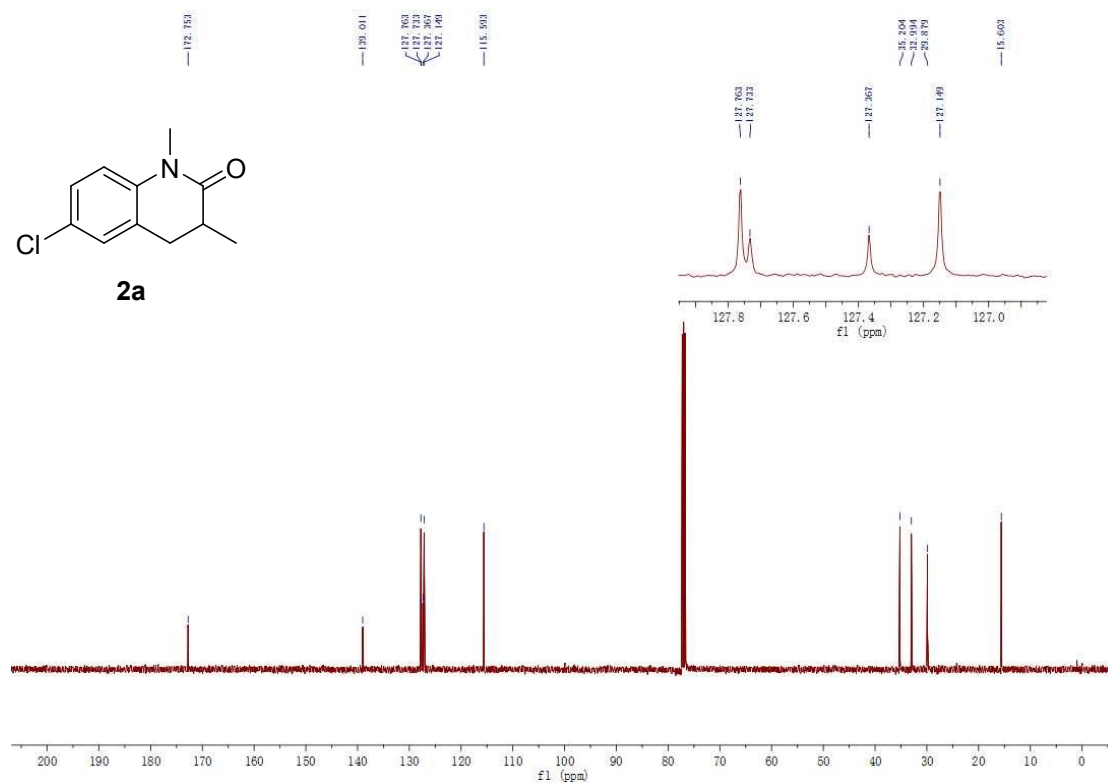

# 6-Fluoro-1,3-dimethyl-3,4-dihydroquinolin-2(1H)-one (2b)

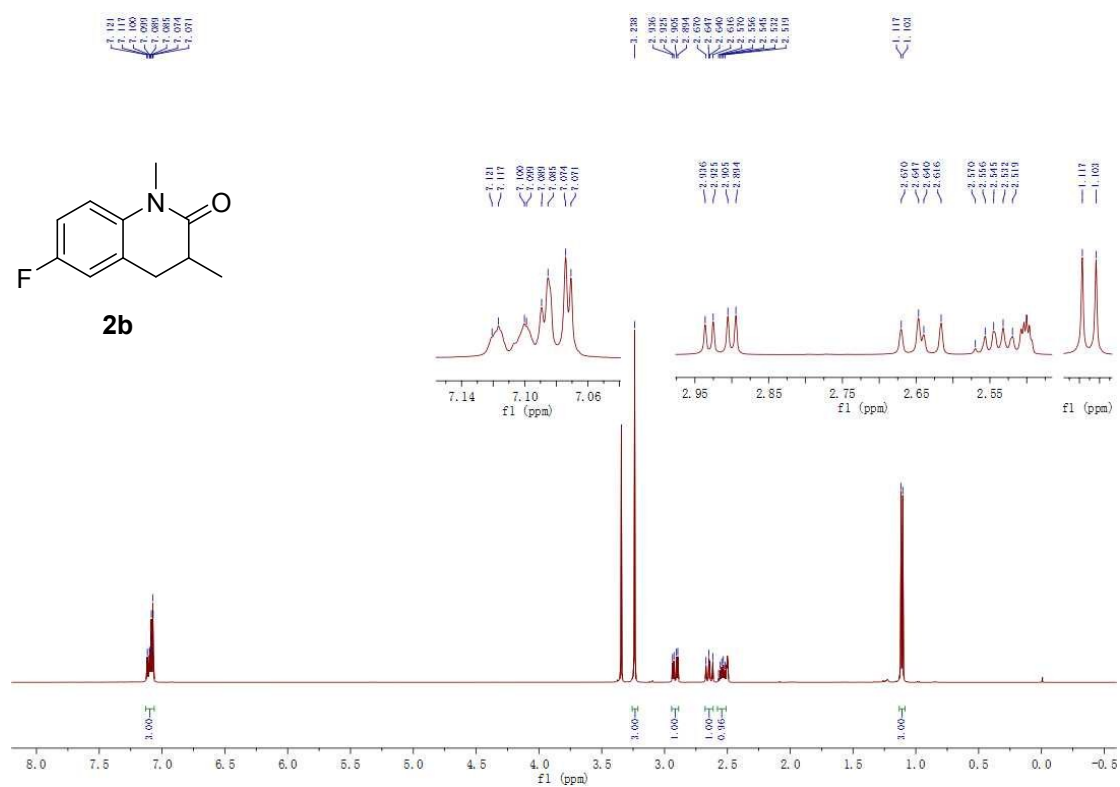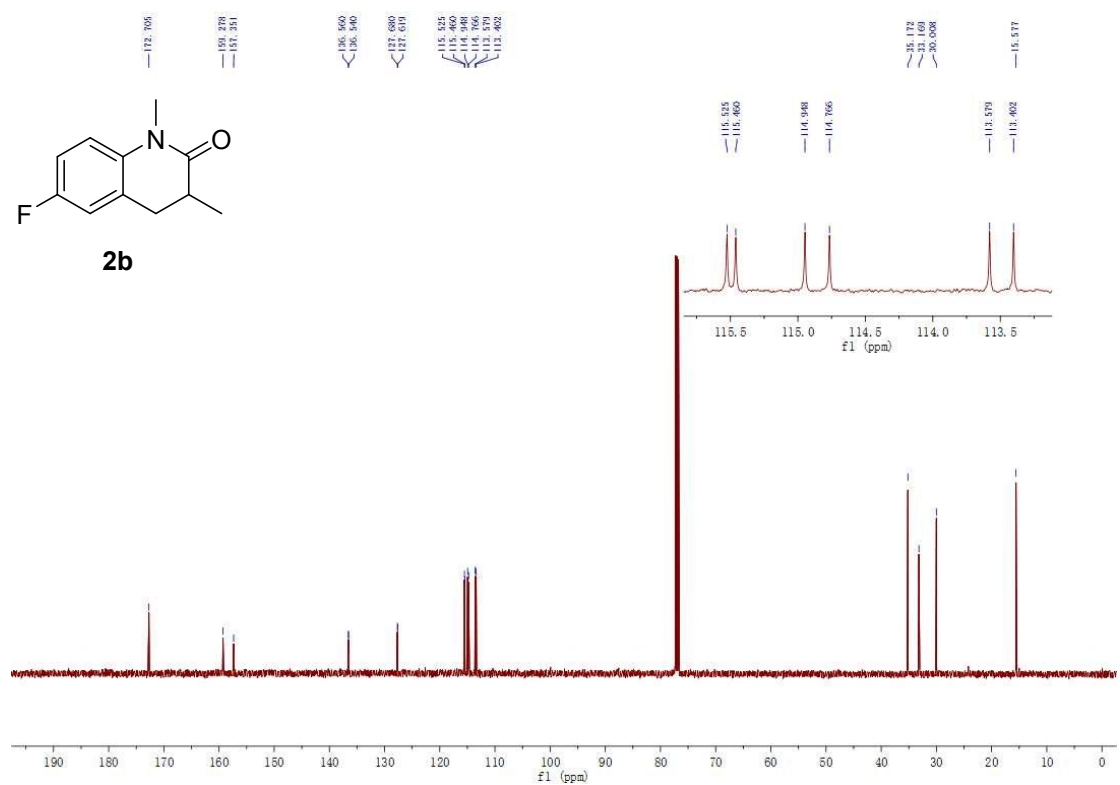



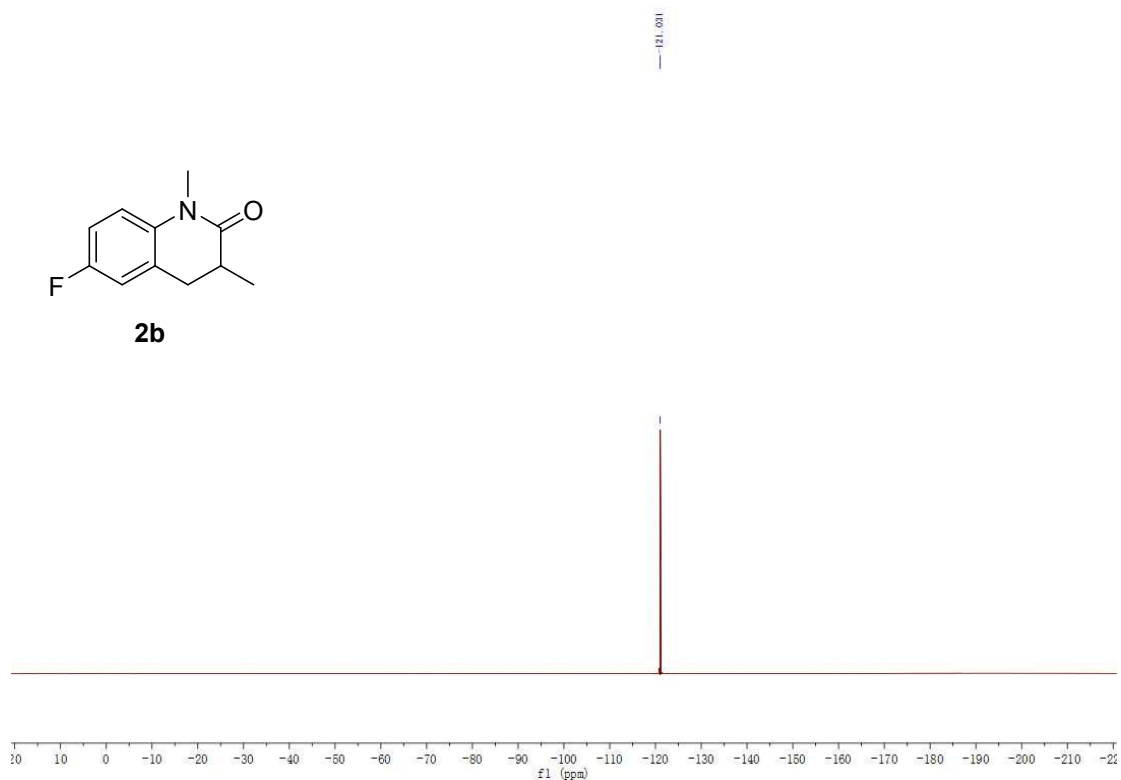

**7-Fluoro-1,3-dimethyl-3,4-dihydroquinolin-2(1*H*)-one (2c)**

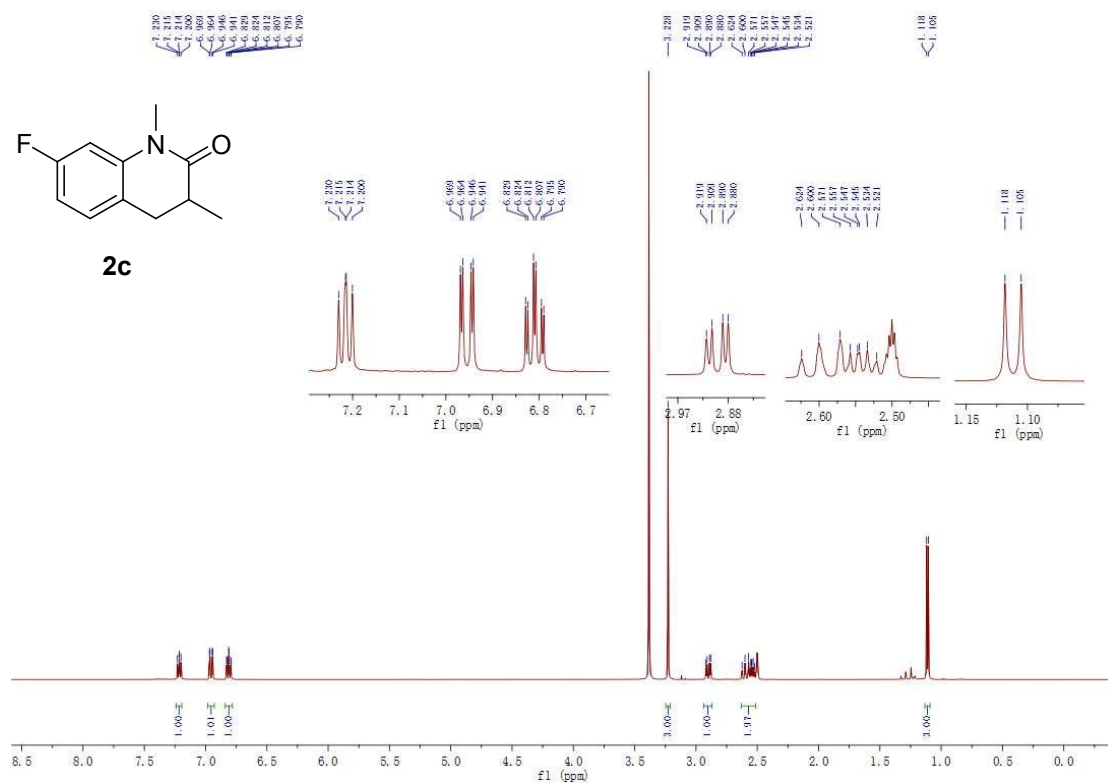

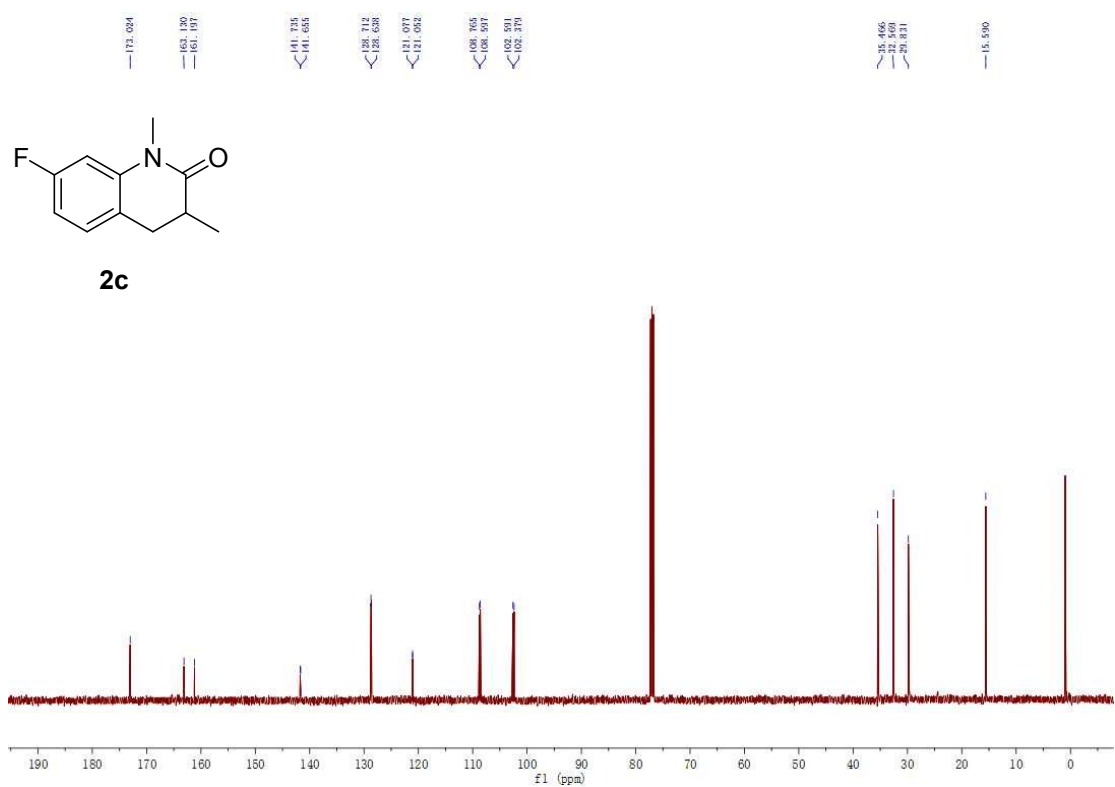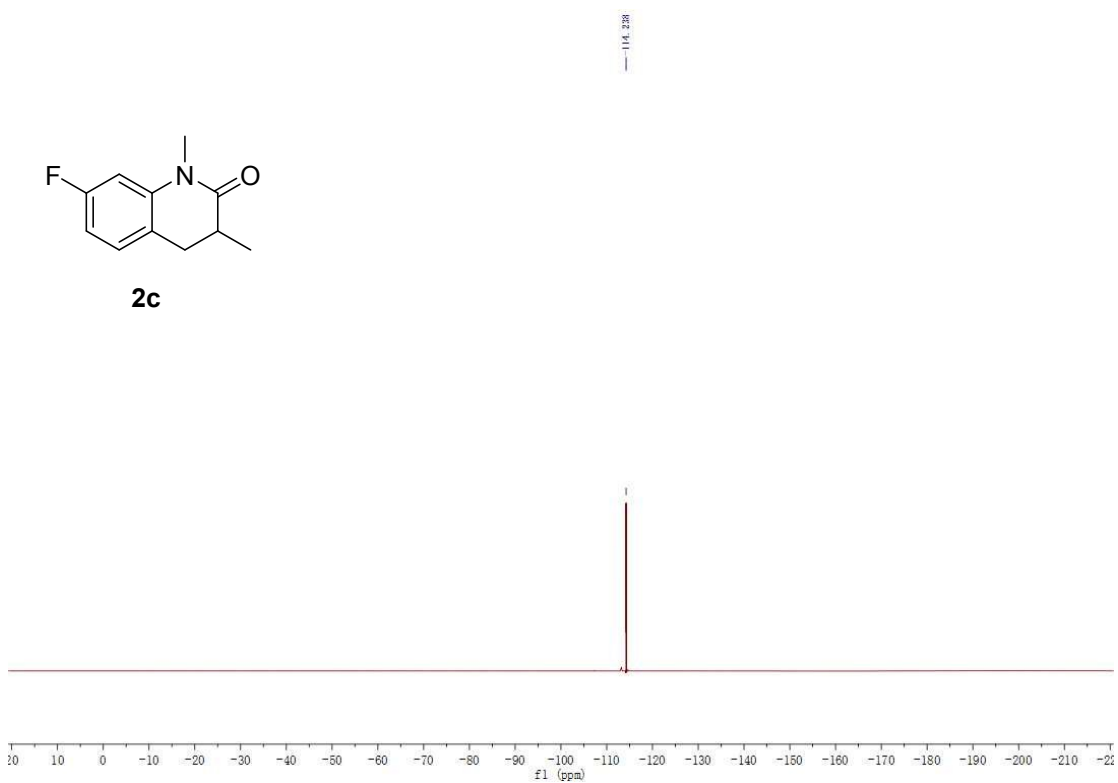

**1,3-Dimethyl-7-(trifluoromethyl)-3,4-dihydroquinolin-2(1H)-one (2d)**

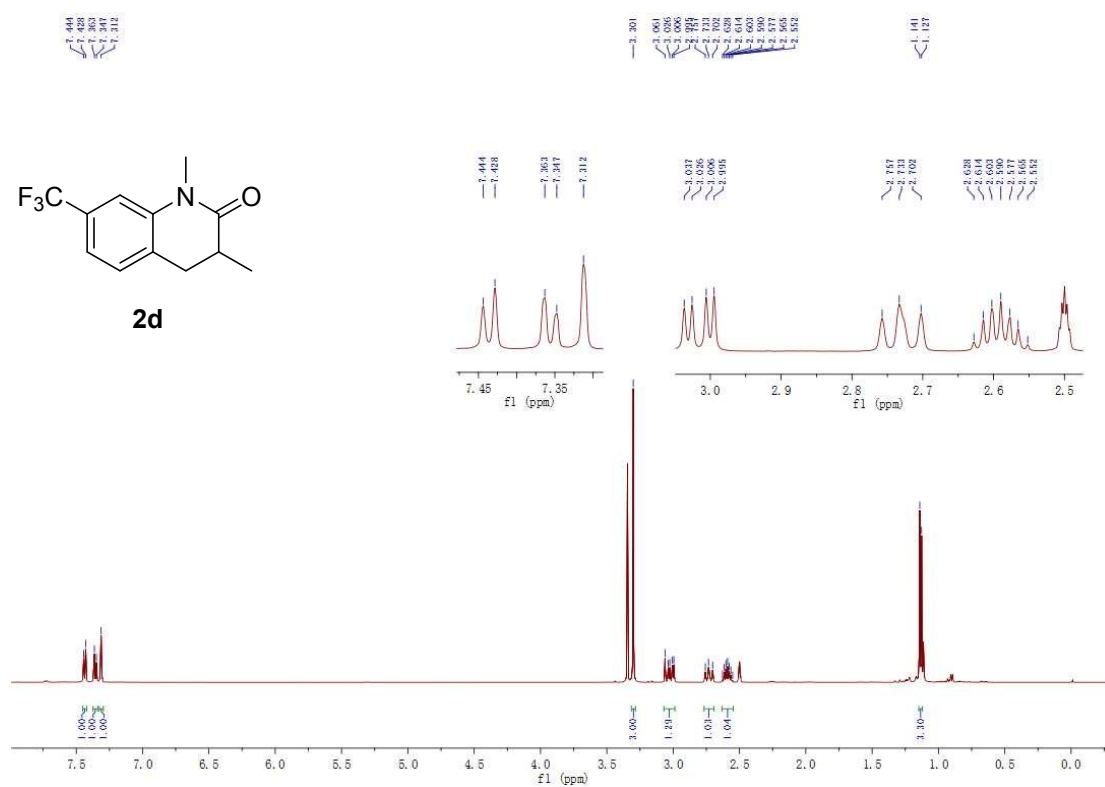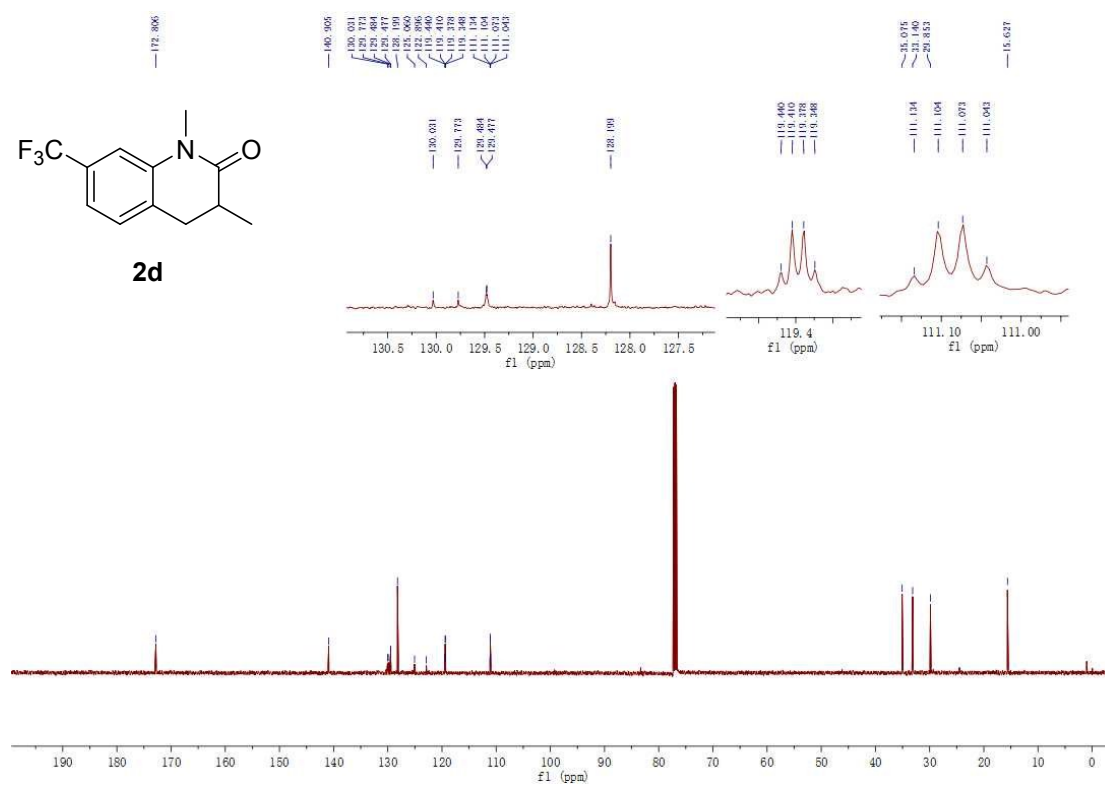

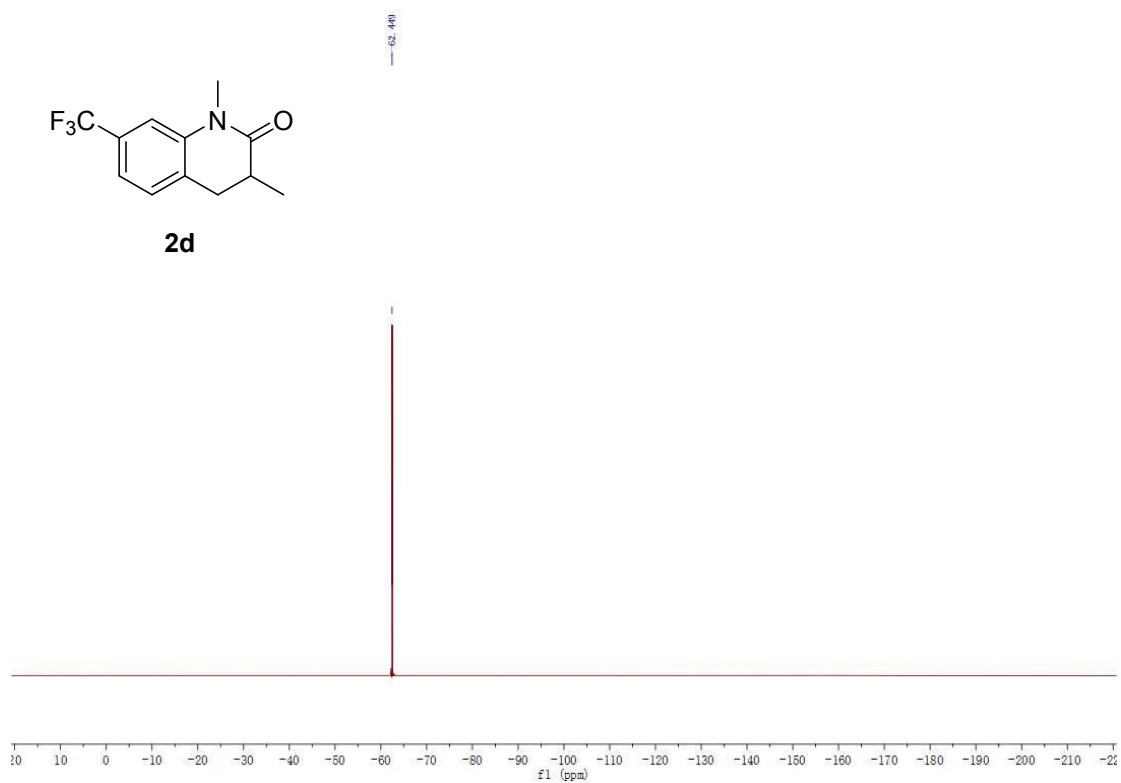

1-Ethyl-3-methyl-7-(trifluoromethyl)-3,4-dihydroquinolin-2(1H)-one (2e)

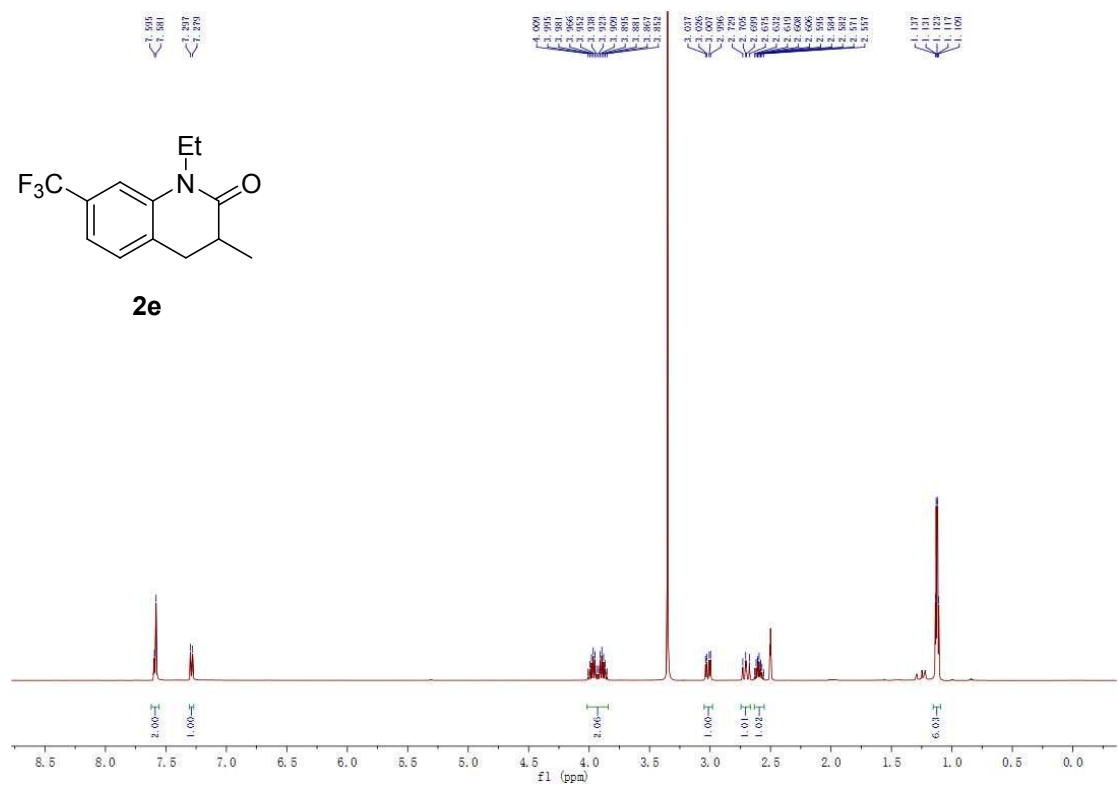

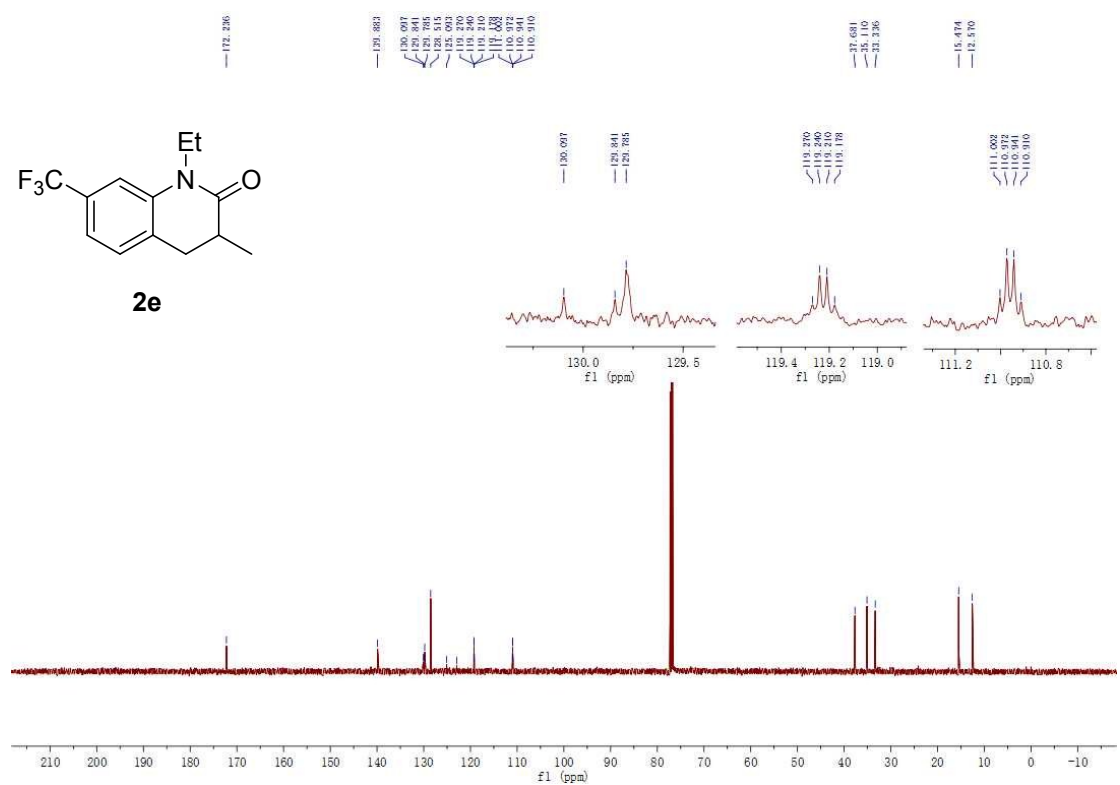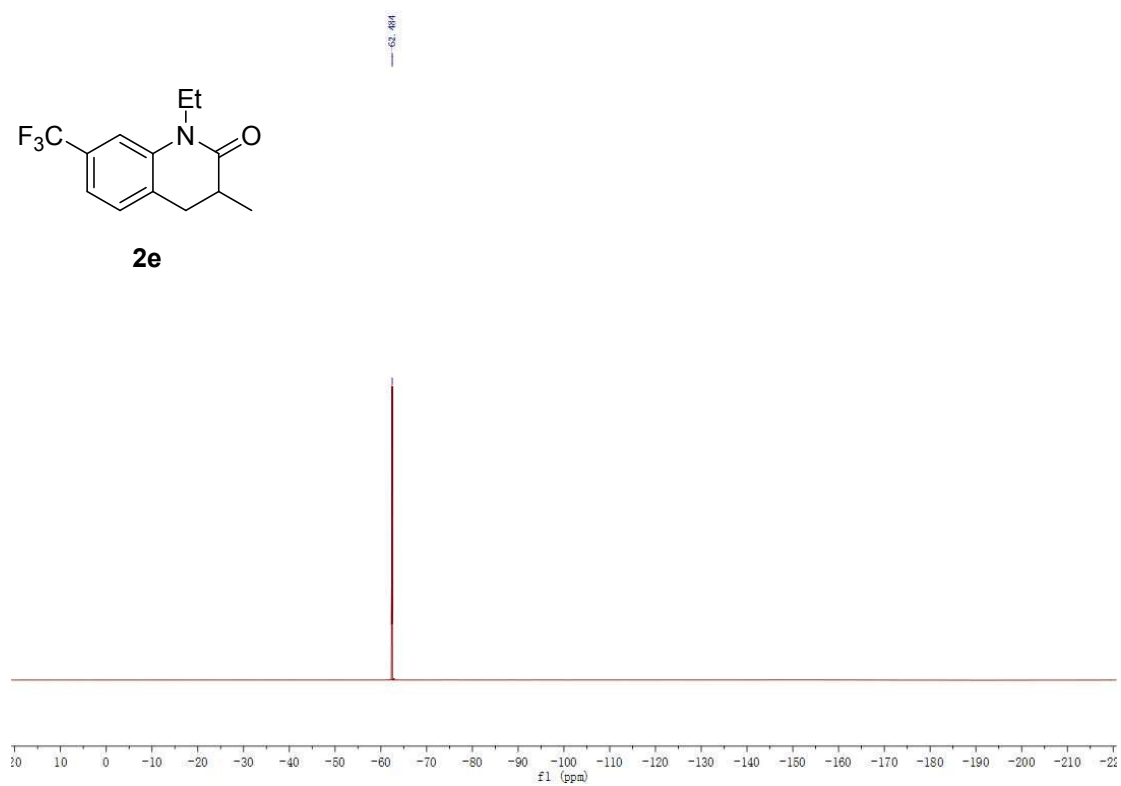

**1-Ethyl-3-methyl-6-(trifluoromethyl)-3,4-dihydroquinolin-2(1*H*)-one (2f)**

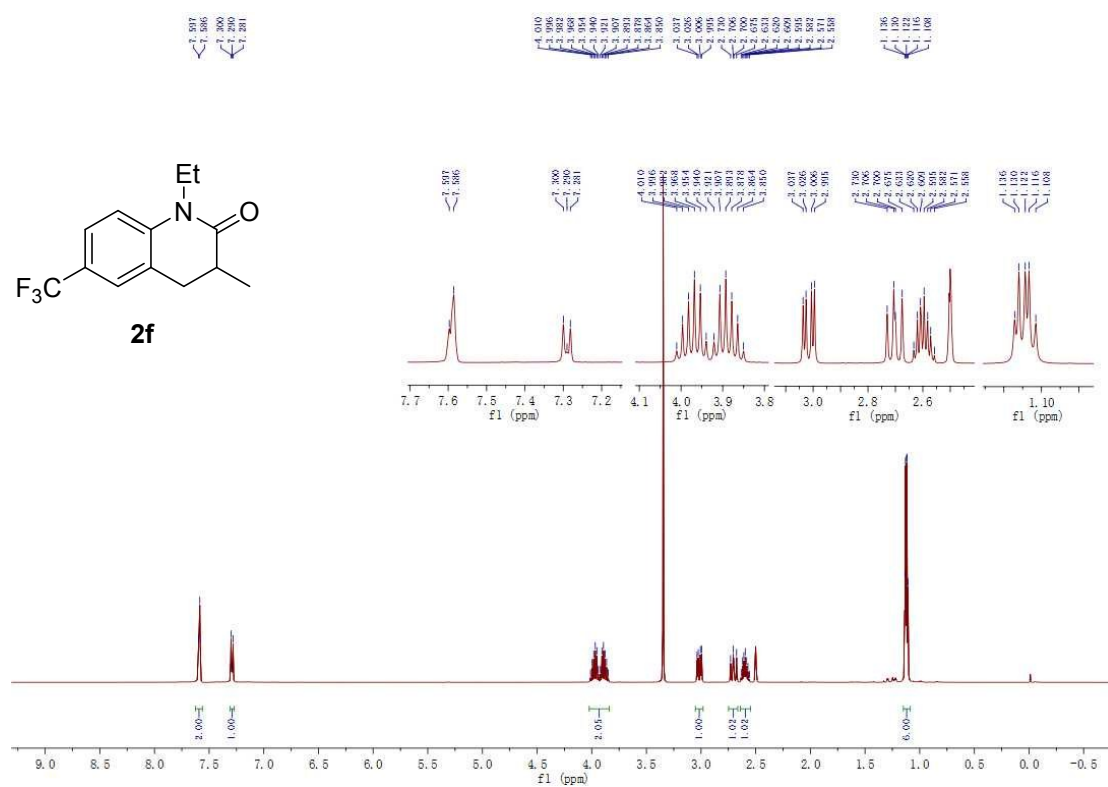

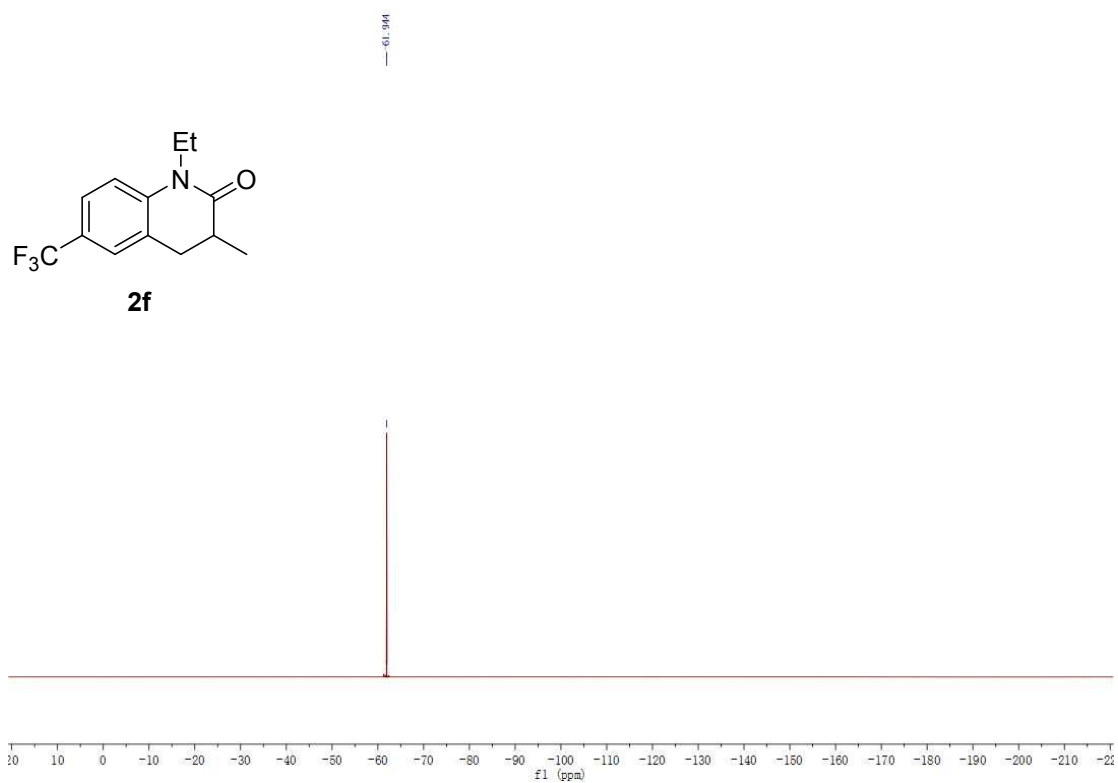

**1,3-Dimethyl-6-(trifluoromethoxy)-3,4-dihydroquinolin-2(1H)-one (2g)**

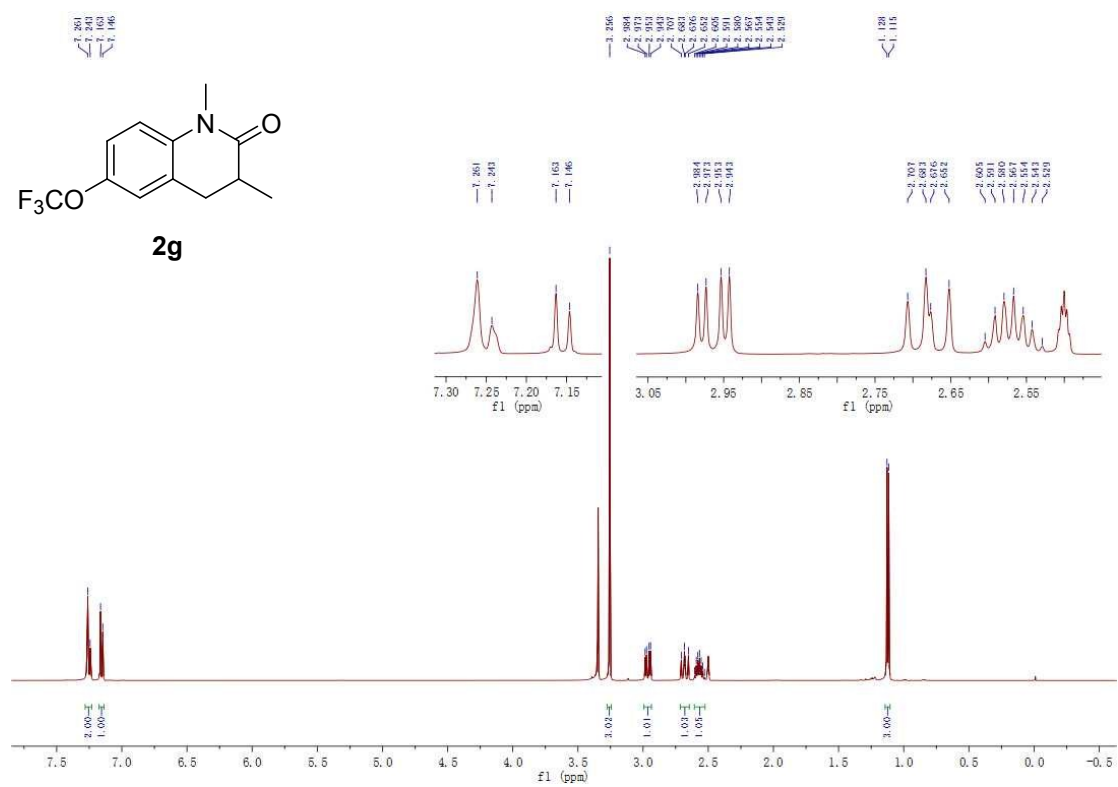





# 1,3-Dimethyl-2-oxo-1,2,3,4-tetrahydroquinoline-6-carbonitrile (2h)

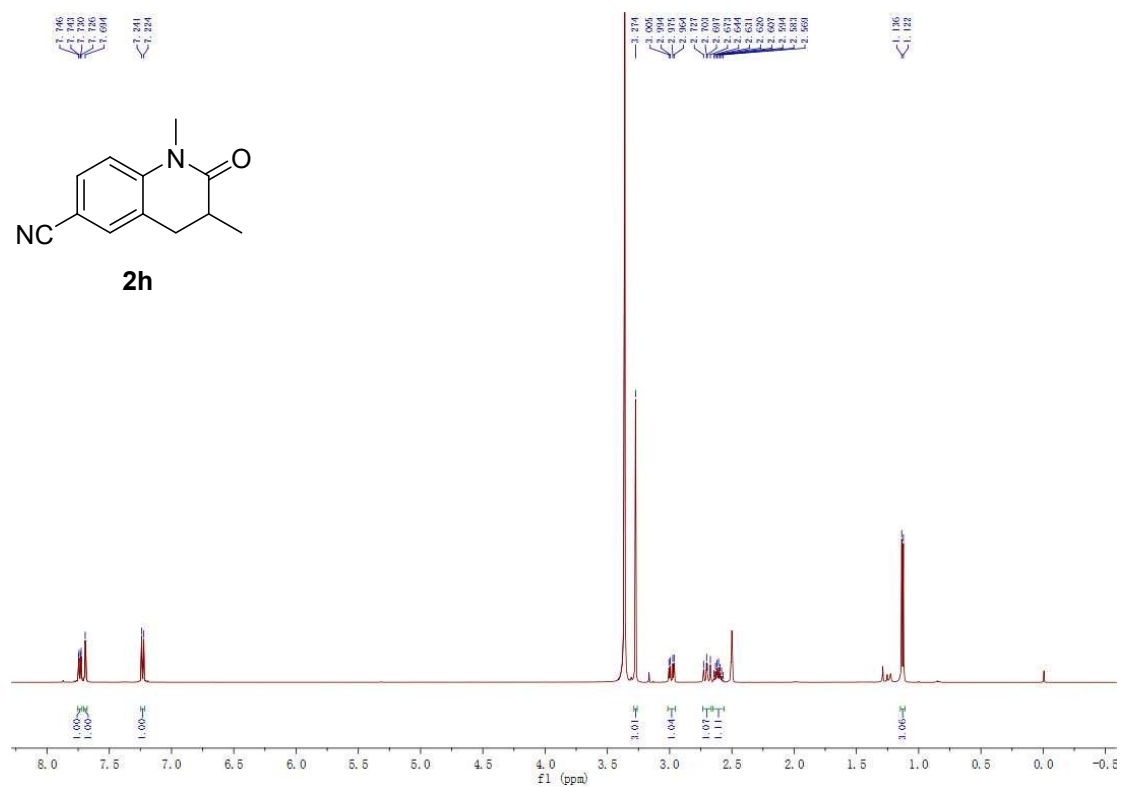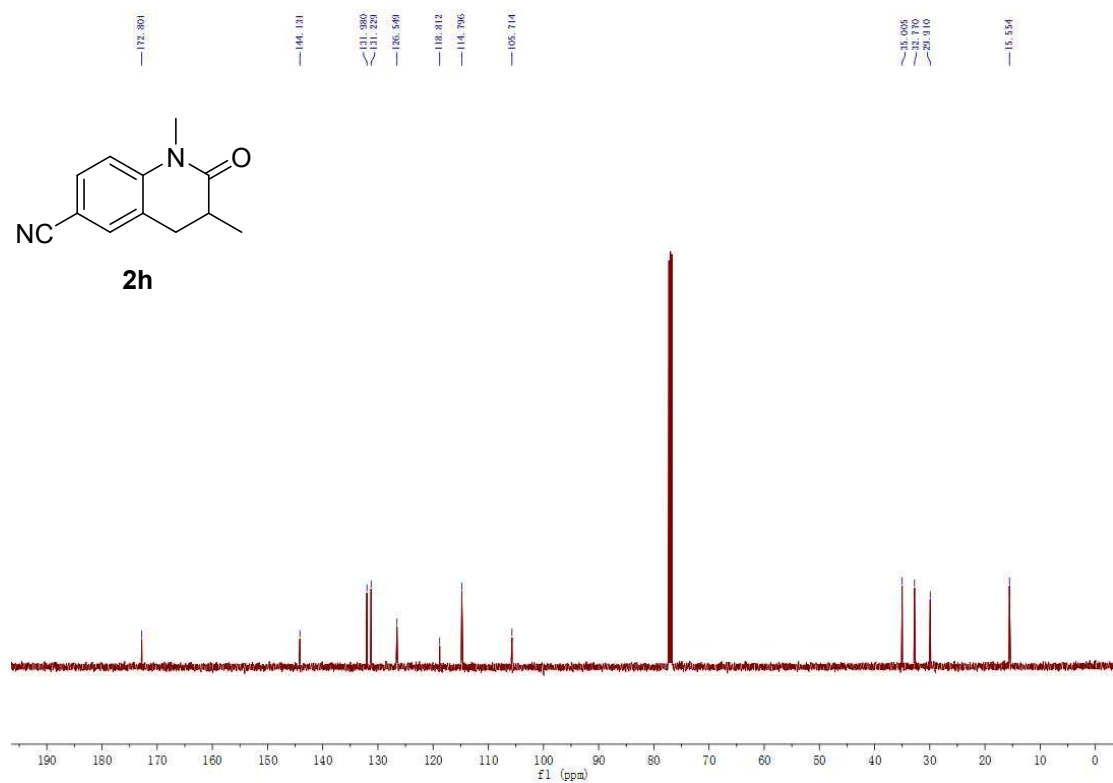

# 6-Isopropyl-1,3-dimethyl-3,4-dihydroquinolin-2(1H)-one (2i)

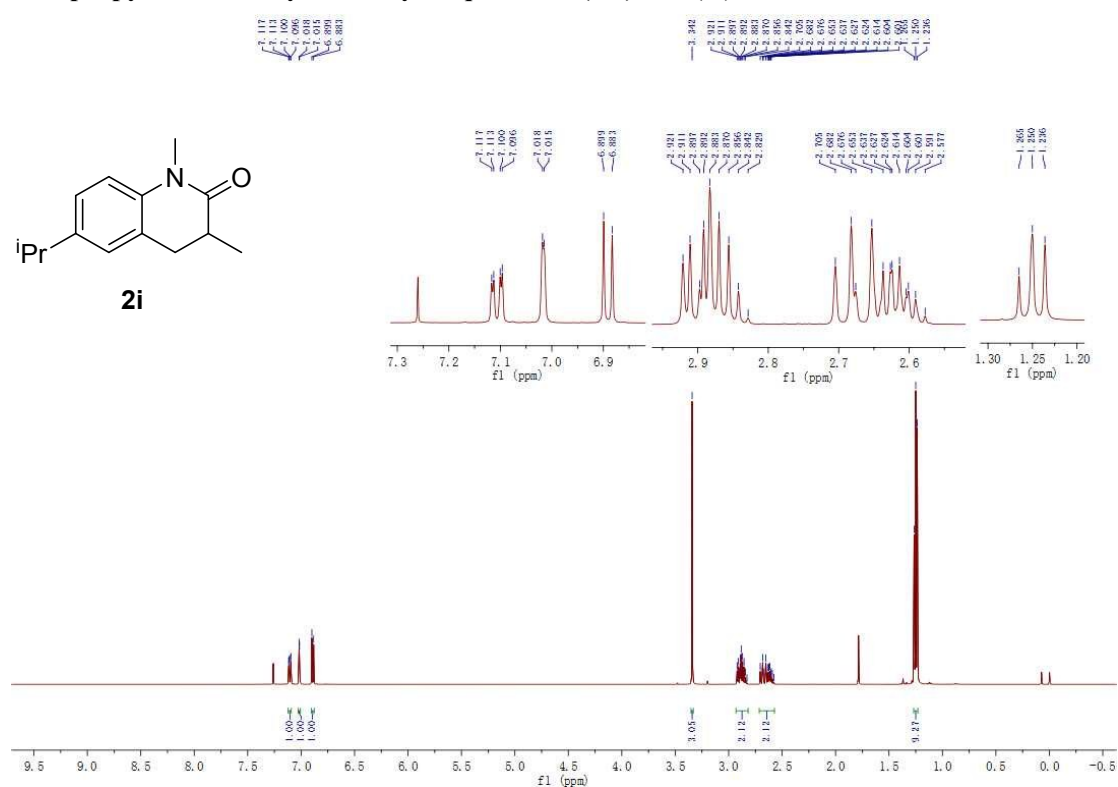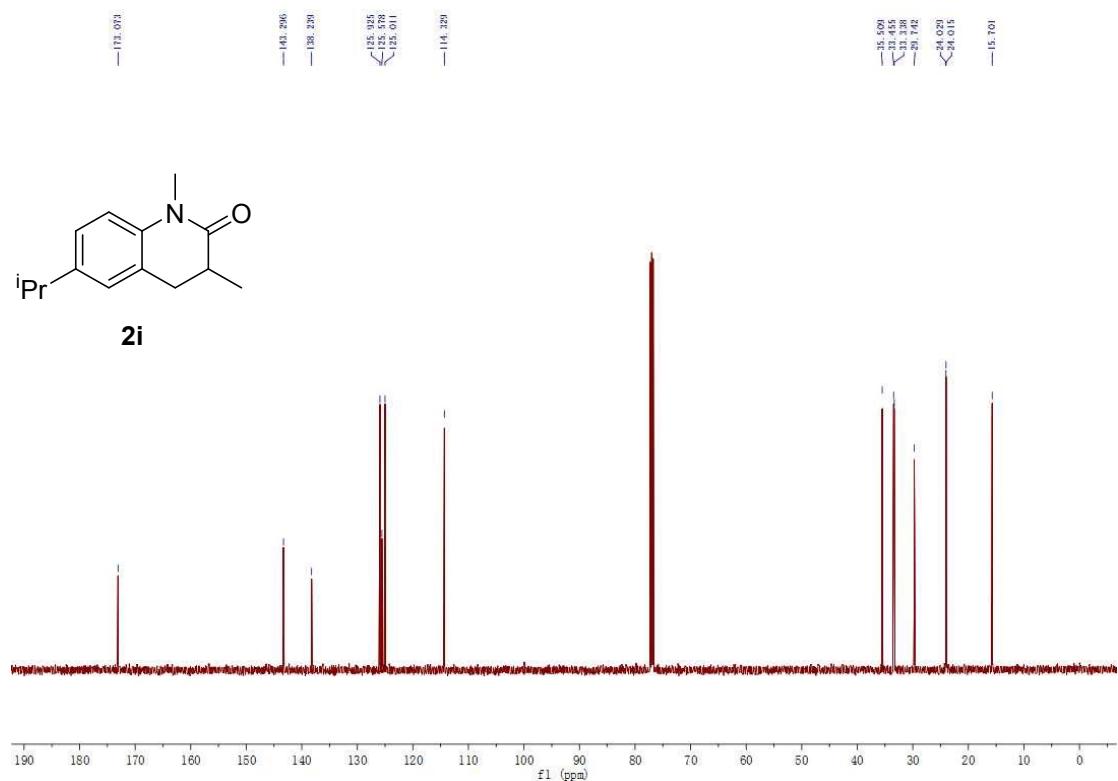

# 1,3,6-Trimethyl-3,4-dihydroquinolin-2(1H)-one (2j)

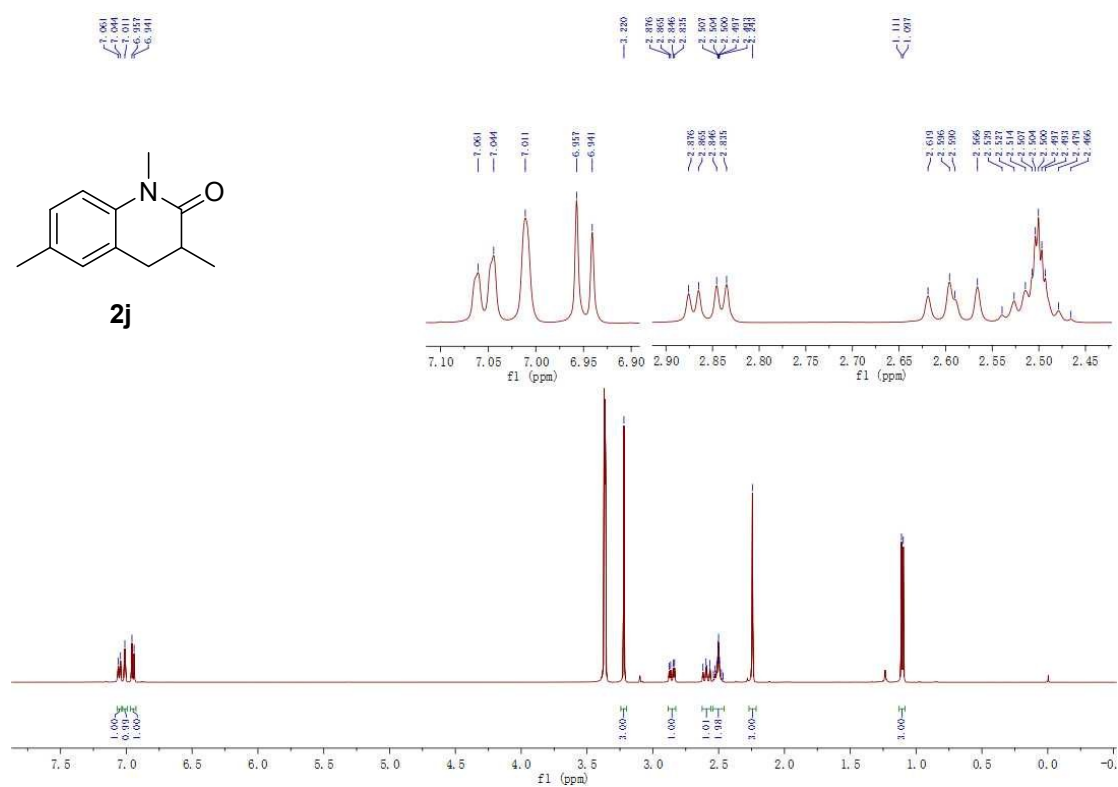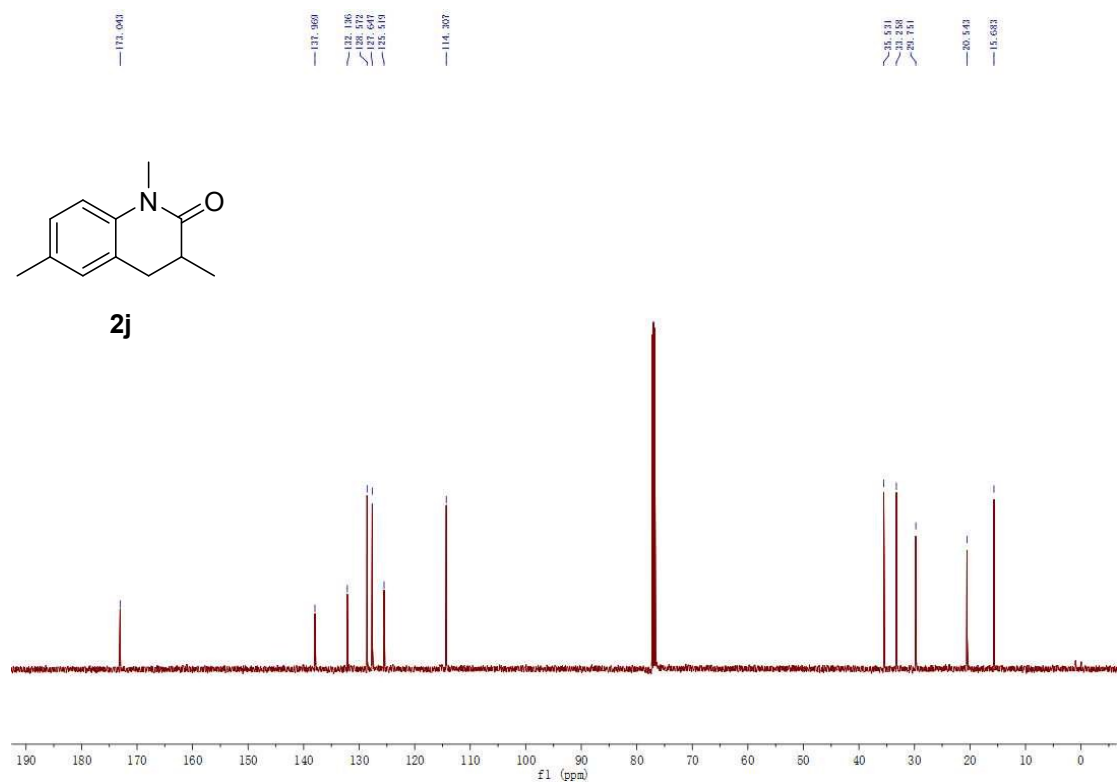

# 1,3,7-Trimethyl-3,4-dihydroquinolin-2(1*H*)-one (2k)

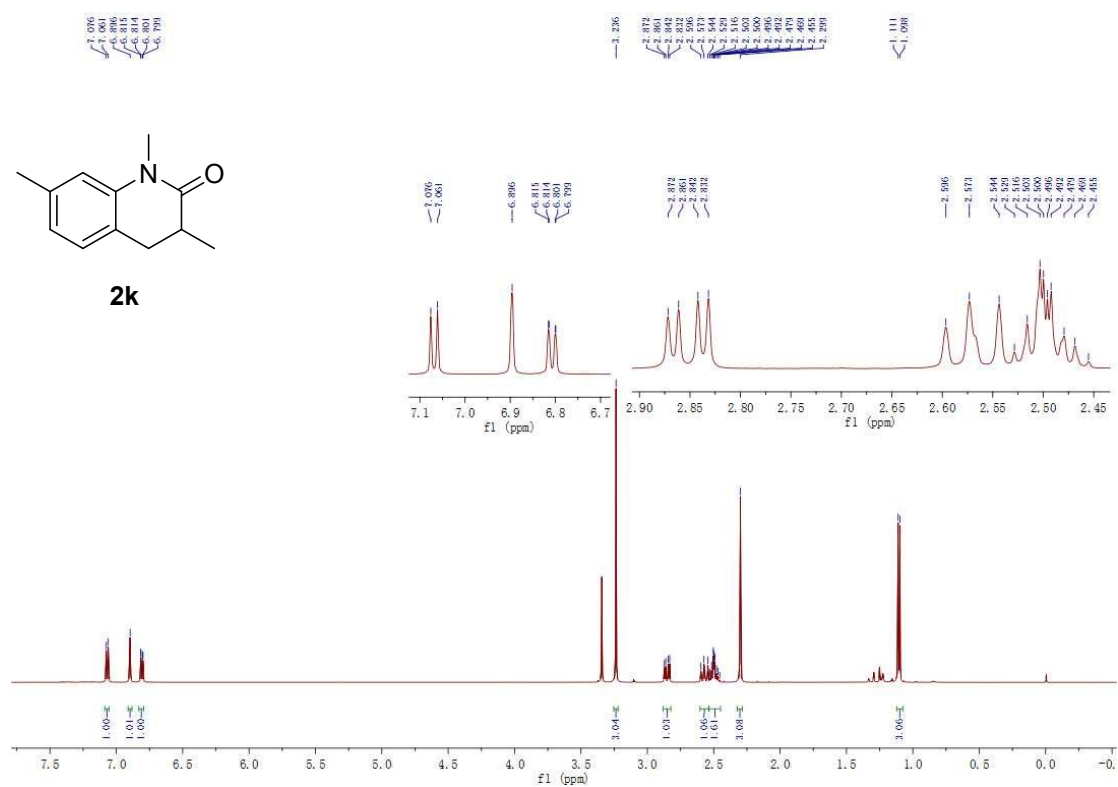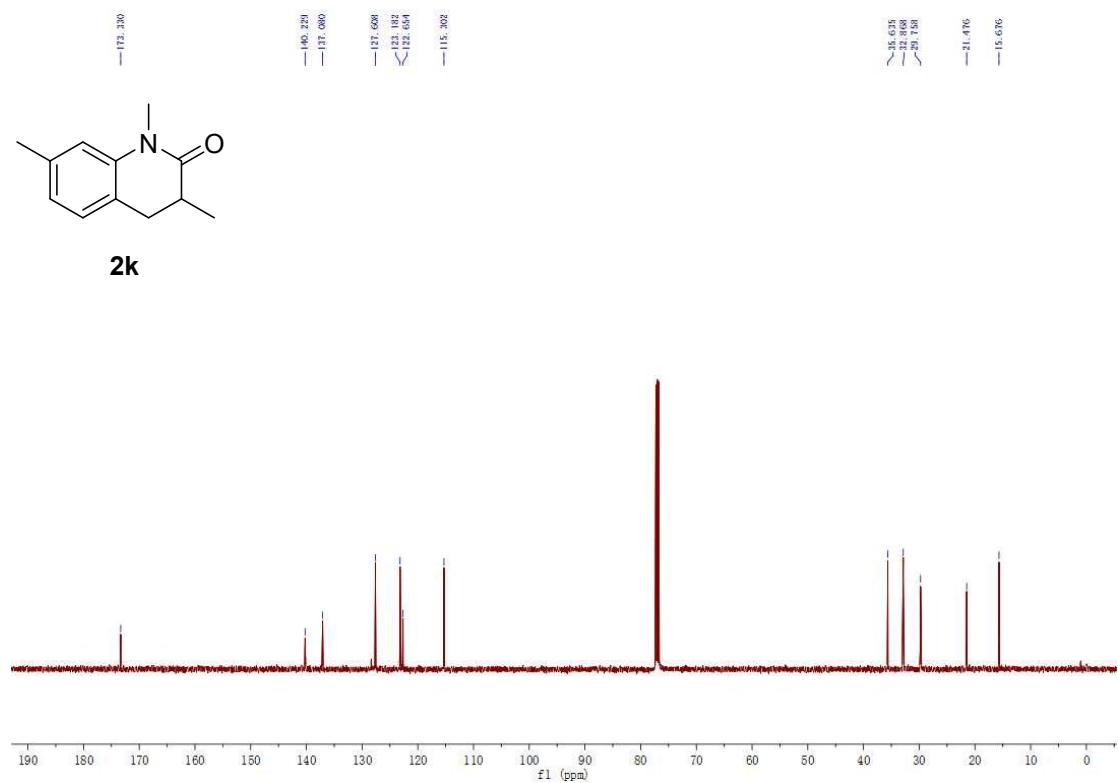

# 1,3,5-Trimethyl-3,4-dihydroquinolin-2(1H)-one (2I)

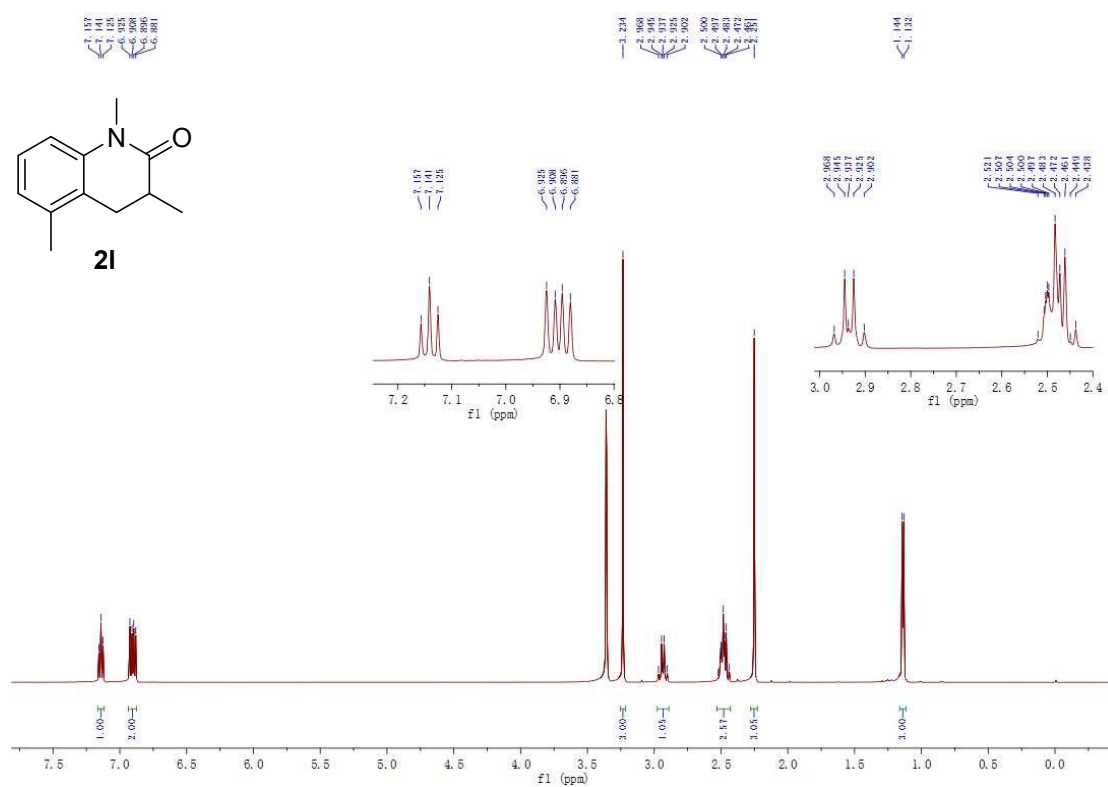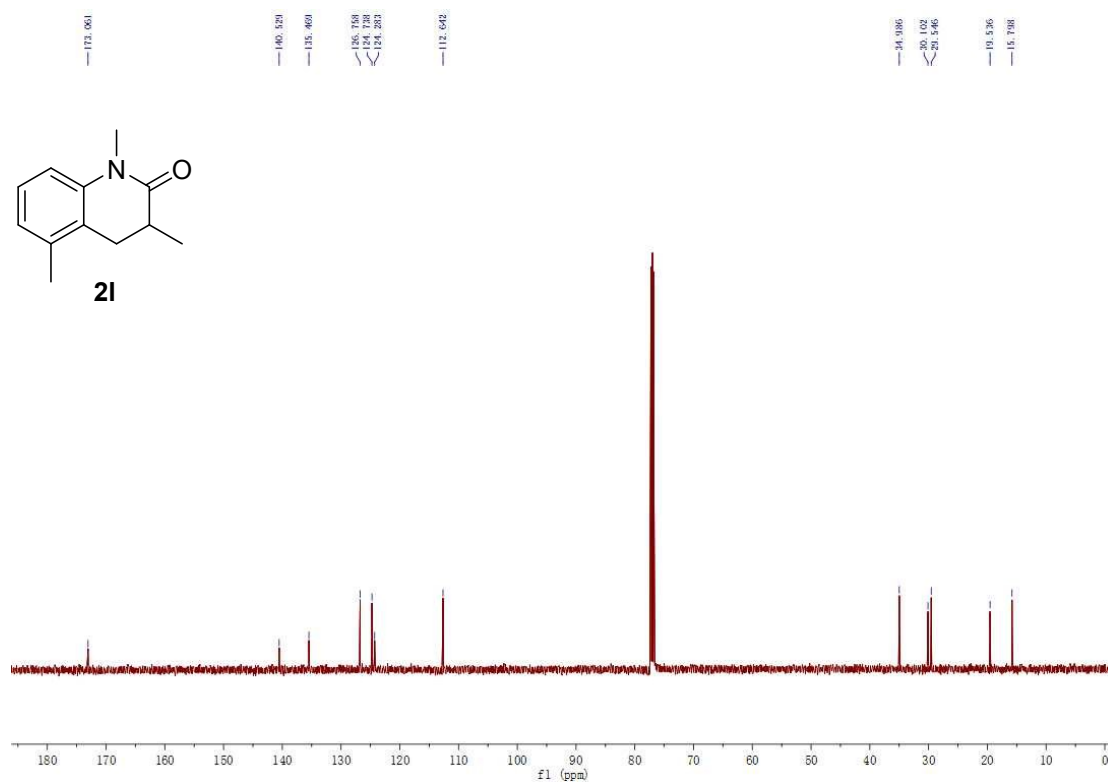

**7-Methoxy-1,3-dimethyl-3,4-dihydroquinolin-2(1H)-one (2m)**

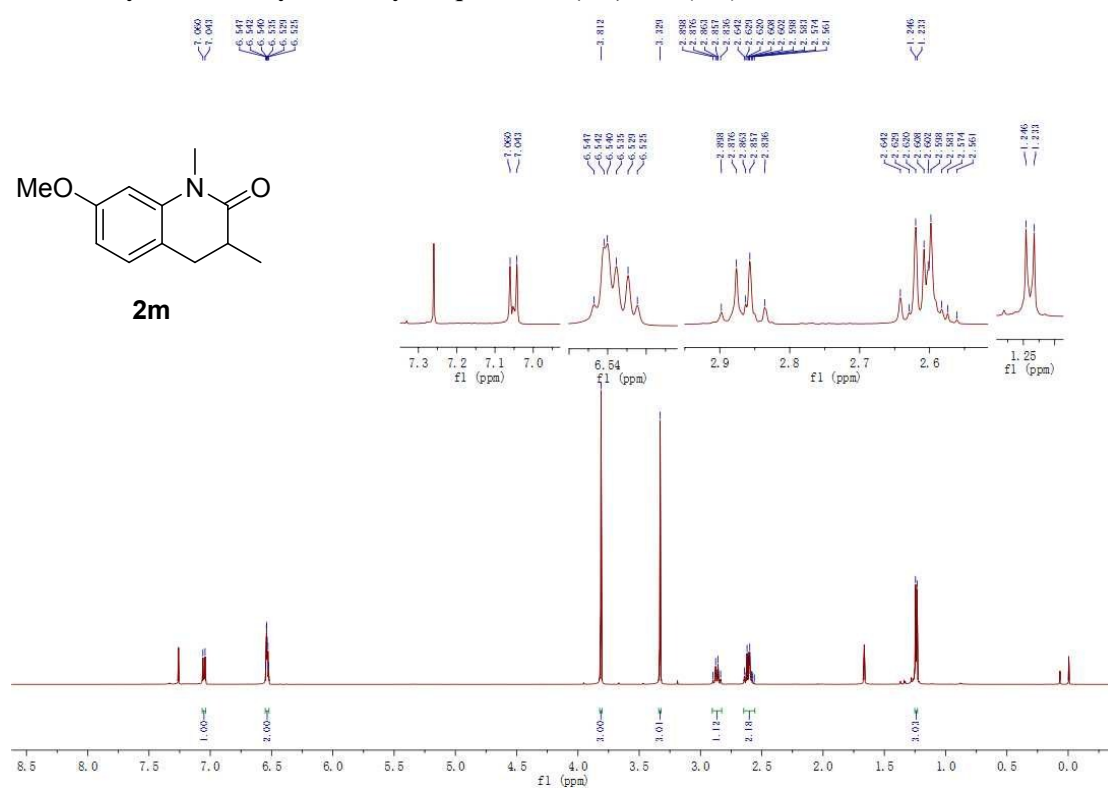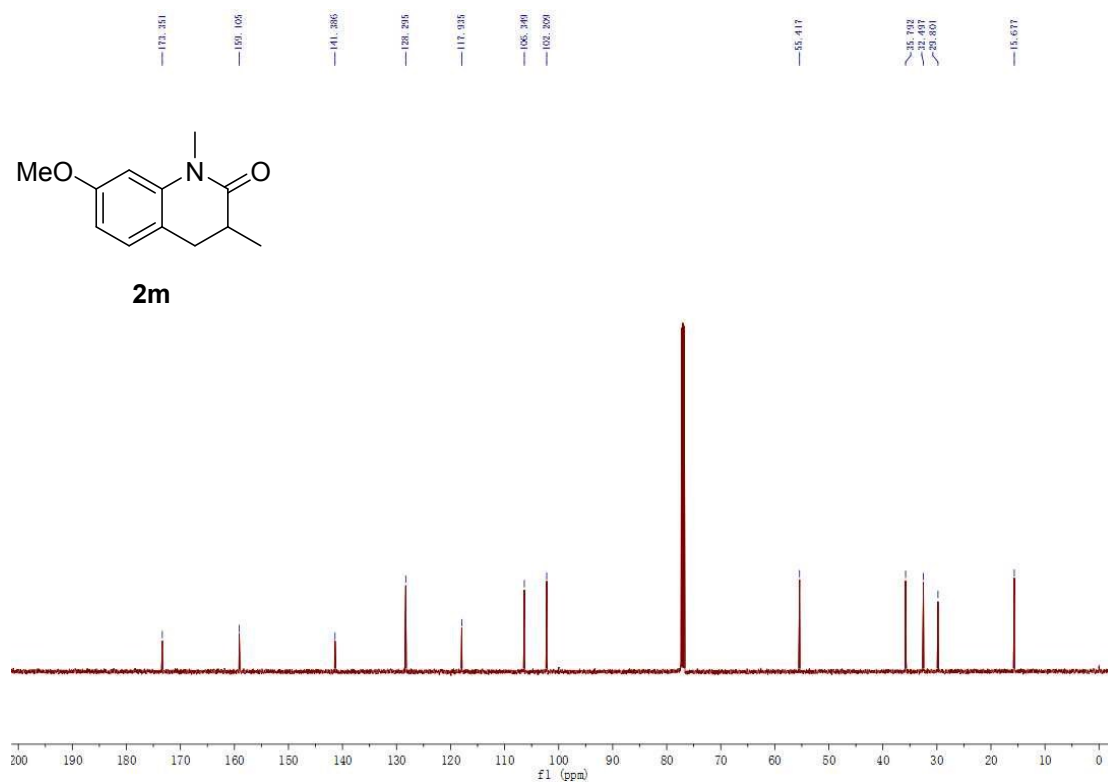

**7-Methoxy-1-methyl-3,4-dihydroquinolin-2(1H)-one (2n)**

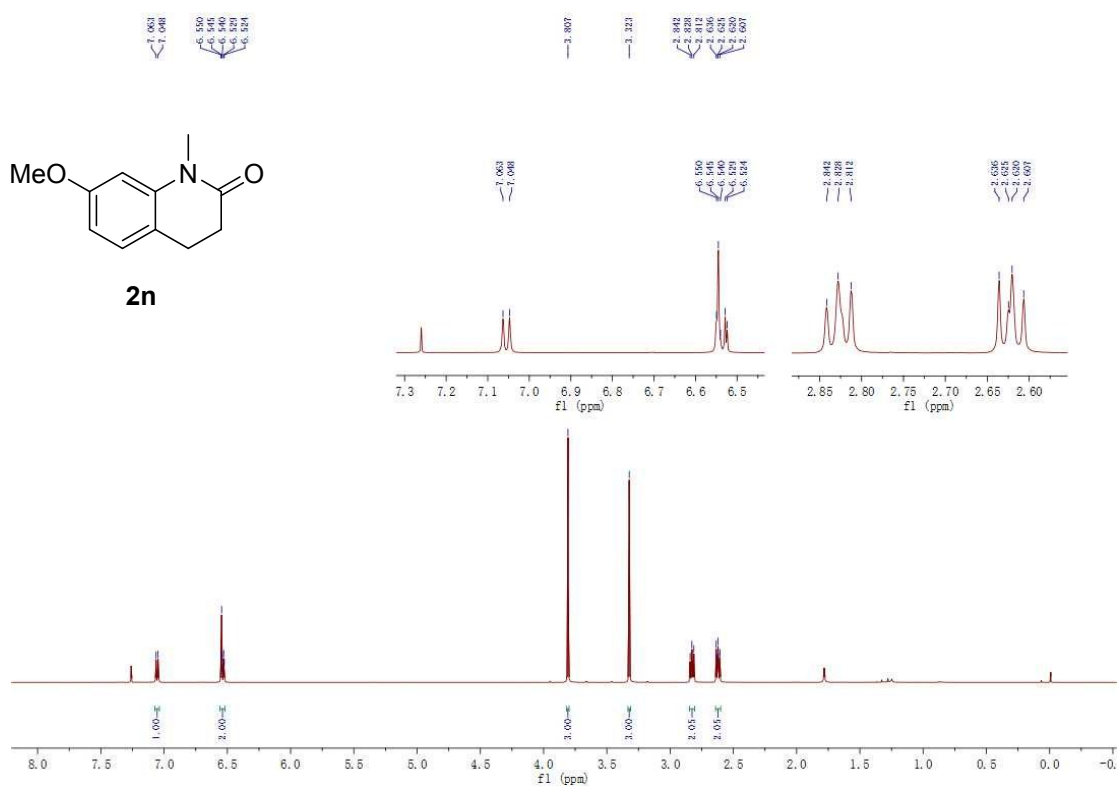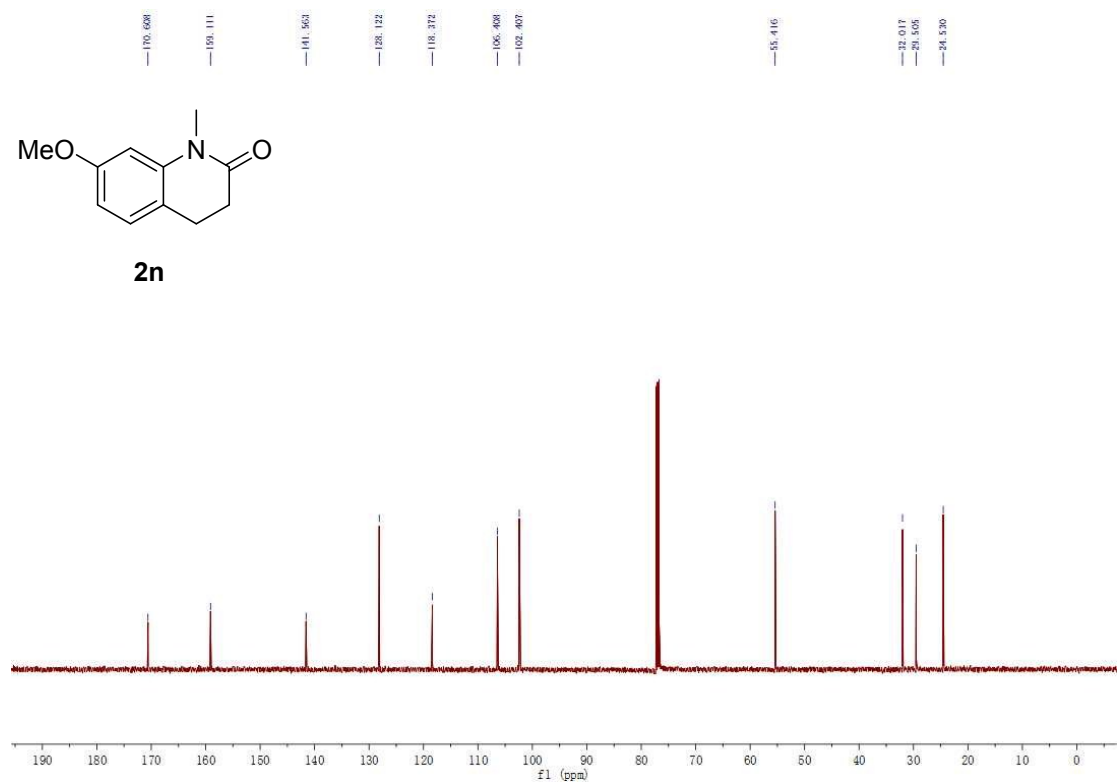

# 1-Ethyl-3-methyl-3,4-dihydroquinolin-2(1H)-one (2o)

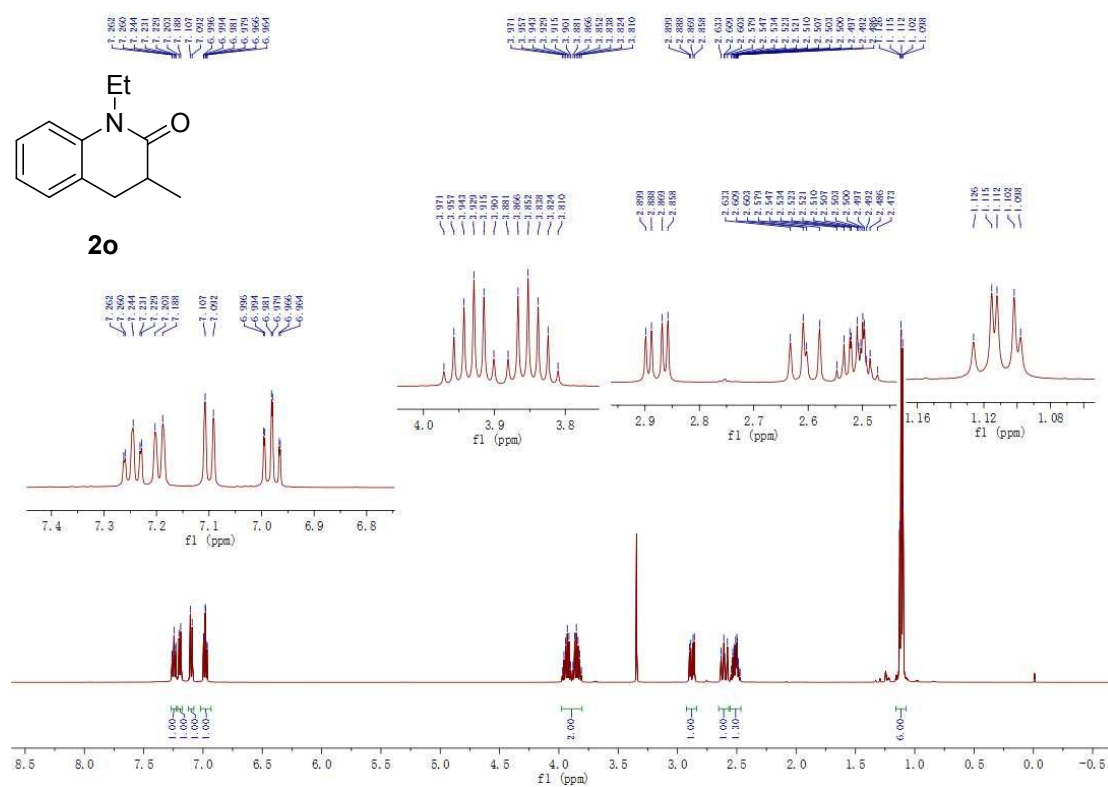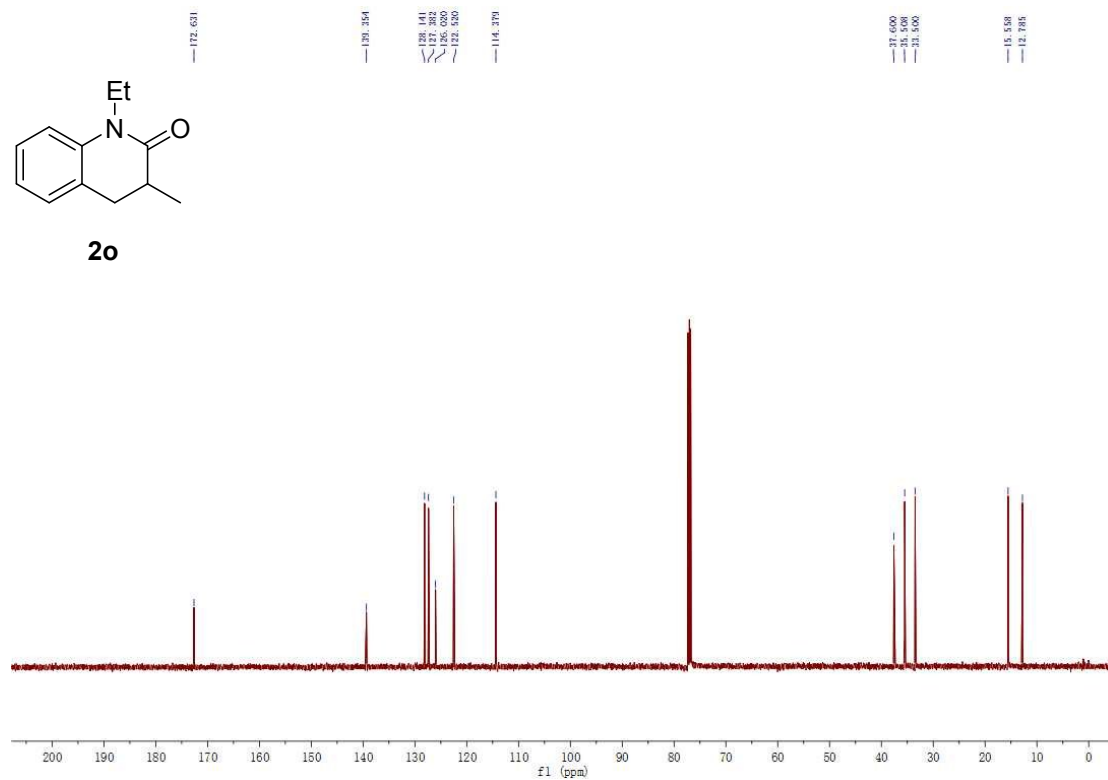



# 1-Benzyl-3-methyl-3,4-dihydroquinolin-2(1H)-one (2p)

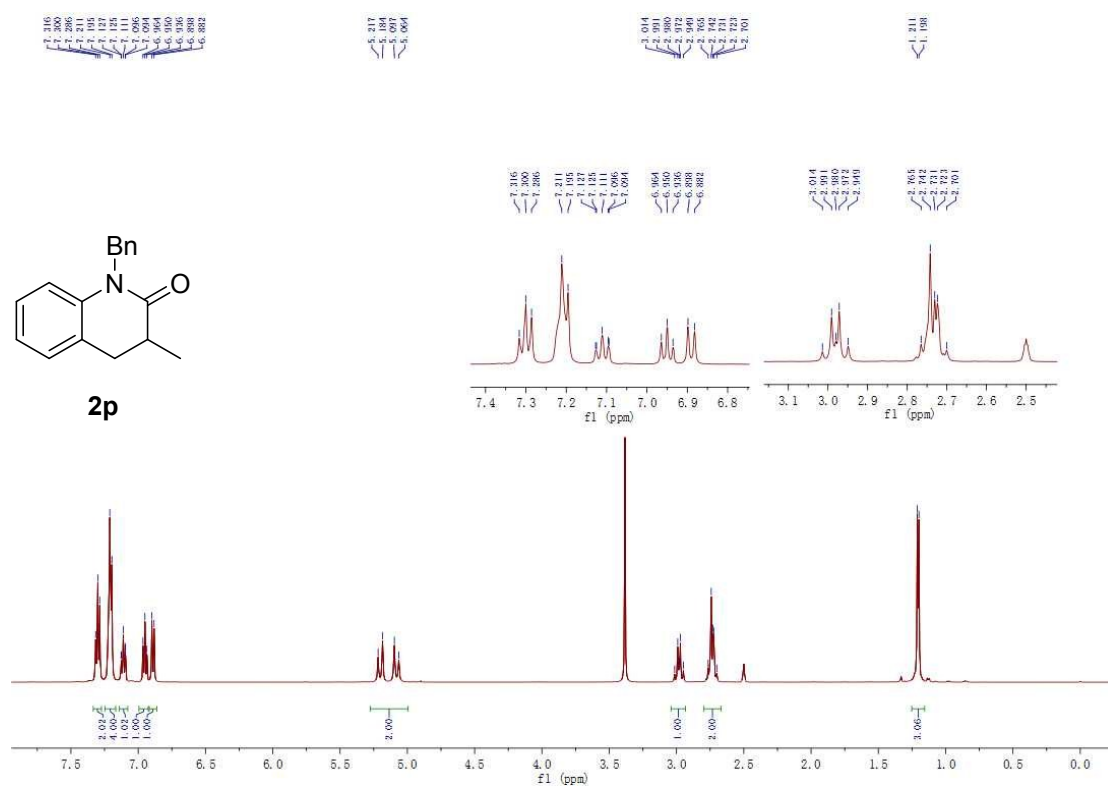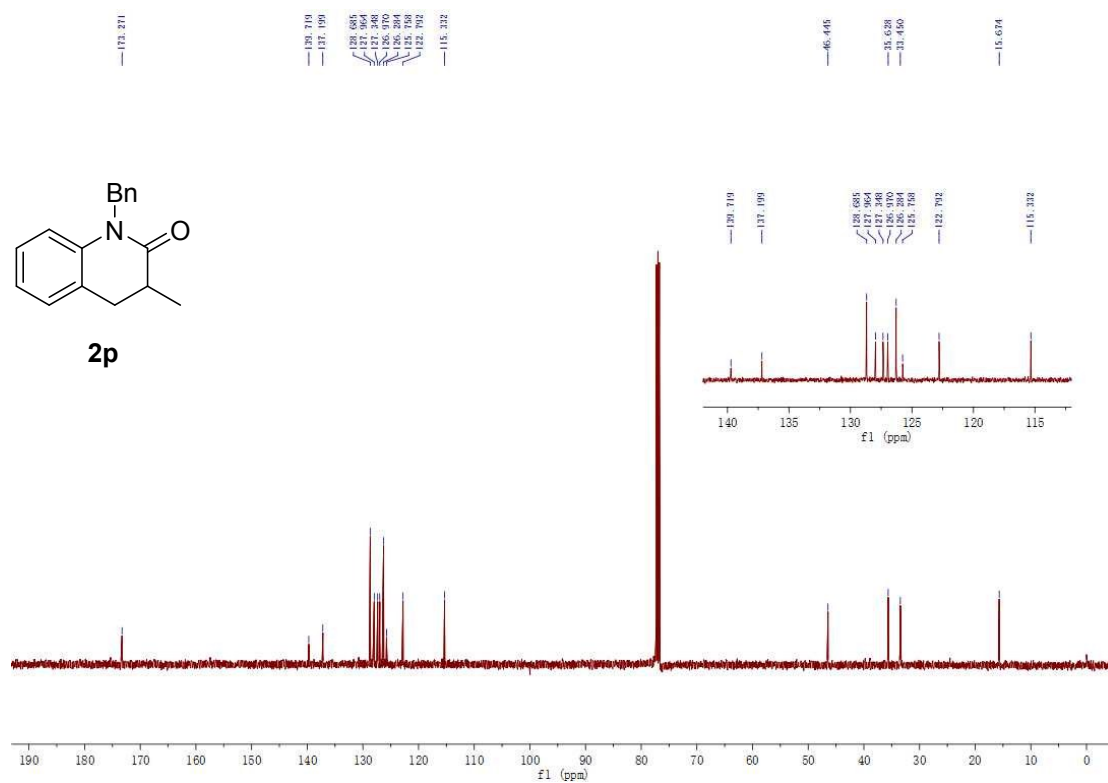

# 1-Methyl-3,4-dihydroquinolin-2(1H)-one (2q)

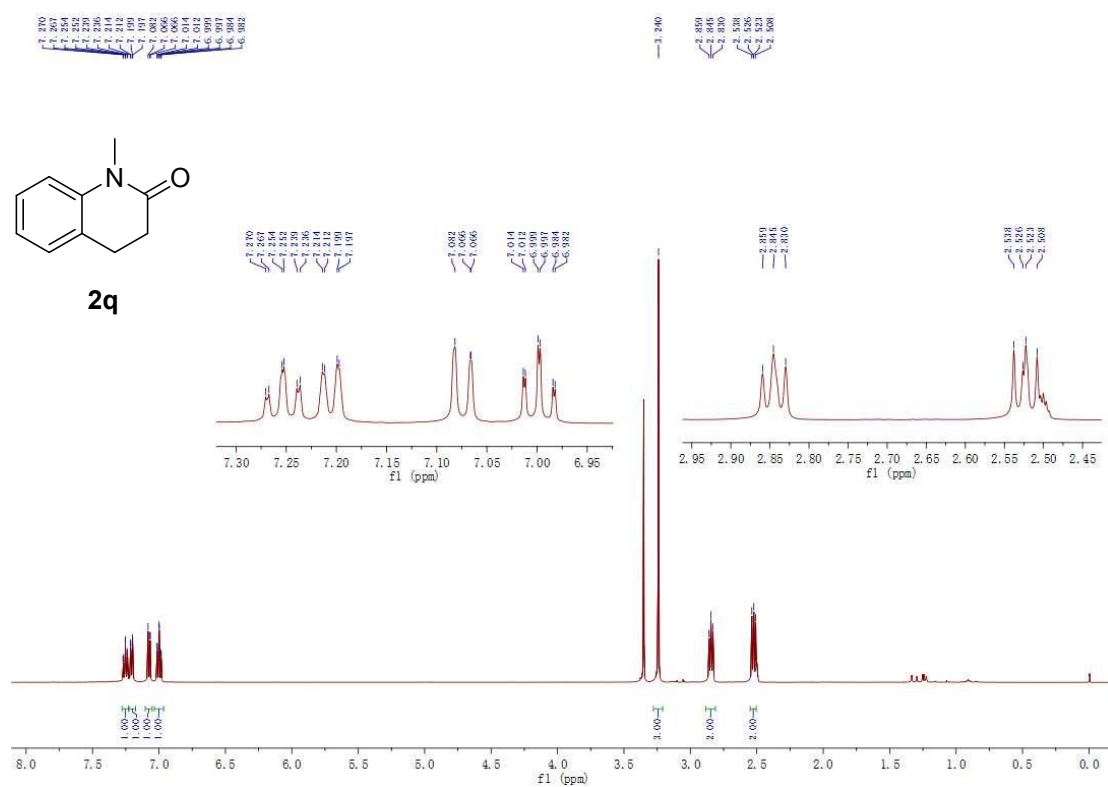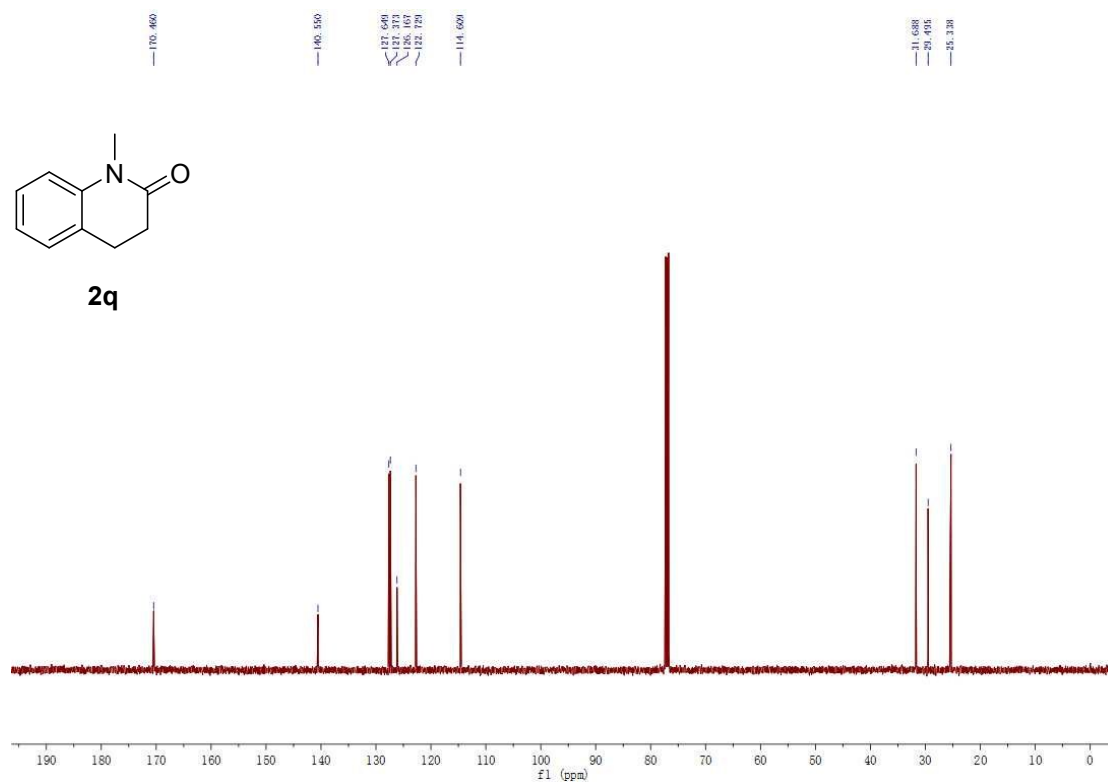

# 1,3-Dimethyl-3,4-dihydroquinolin-2(1H)-one (2r)

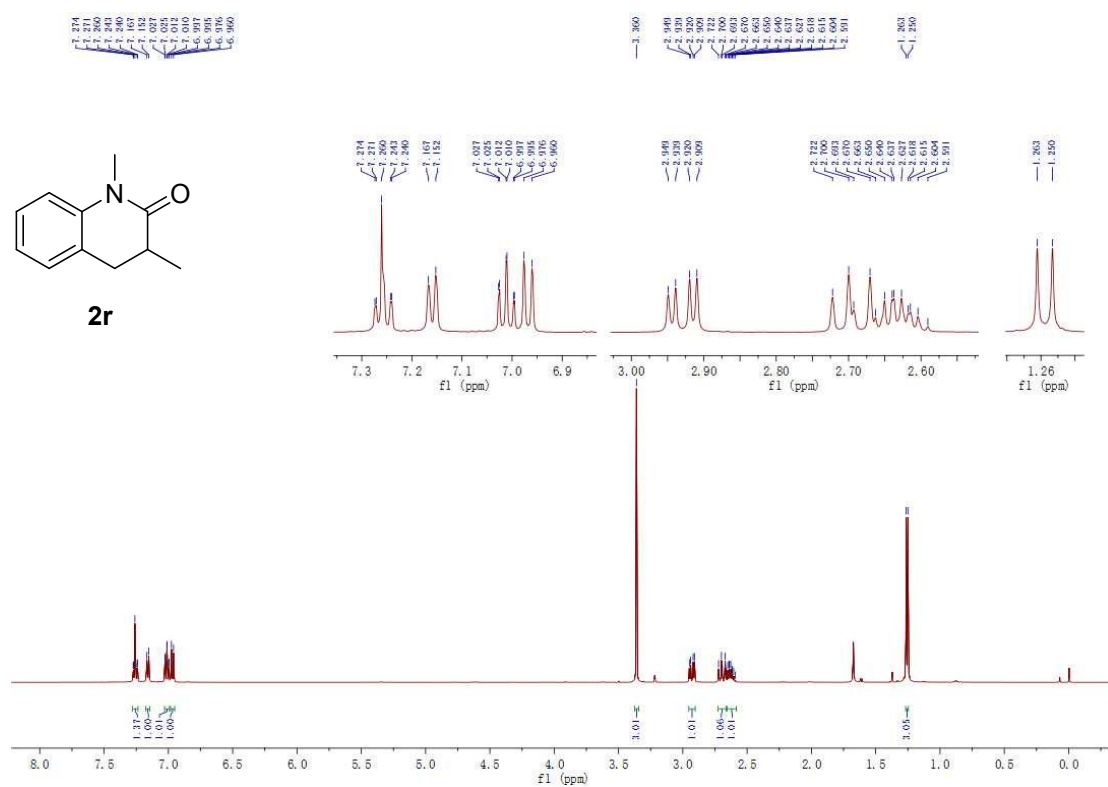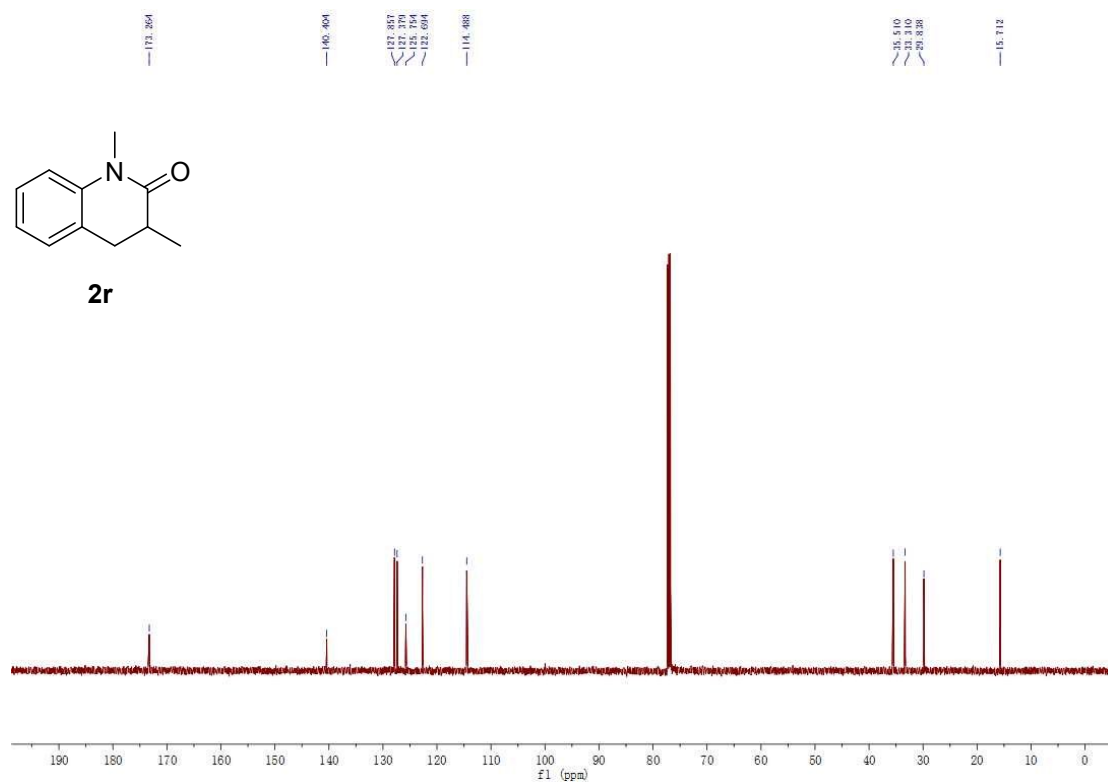

**3-Benzyl-1-methyl-3,4-dihydroquinolin-2(1H)-one (2s) (with 9% 4s)**

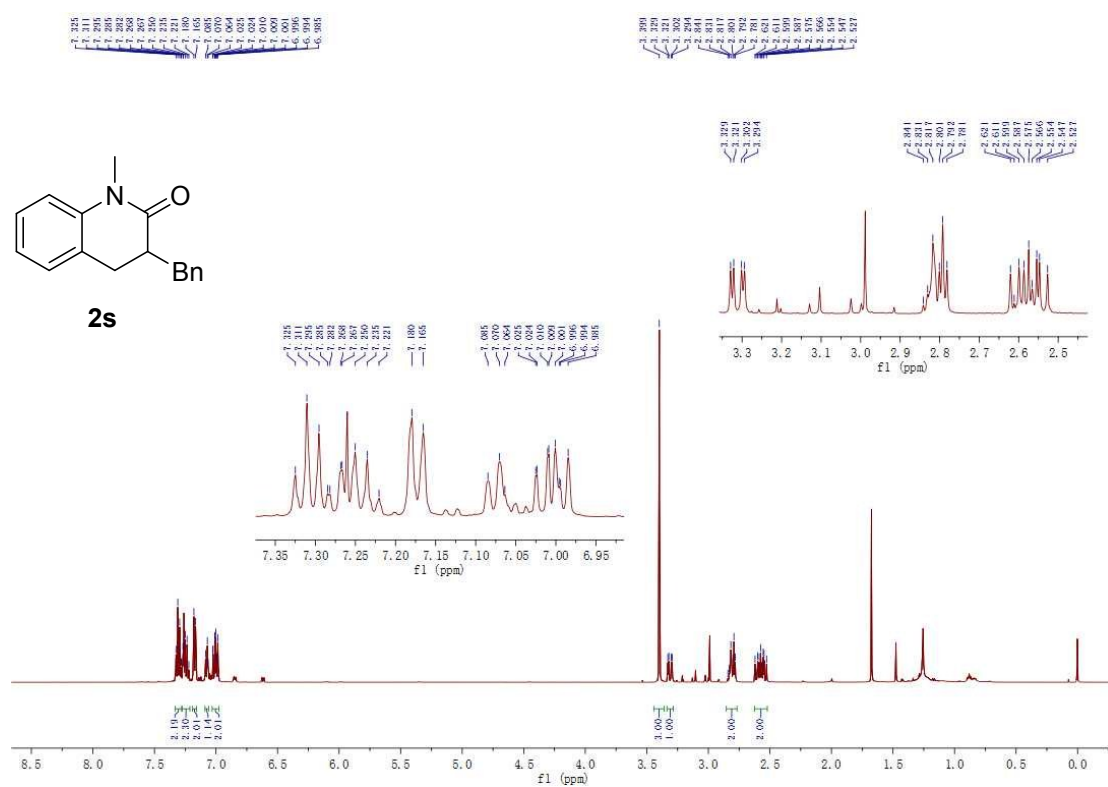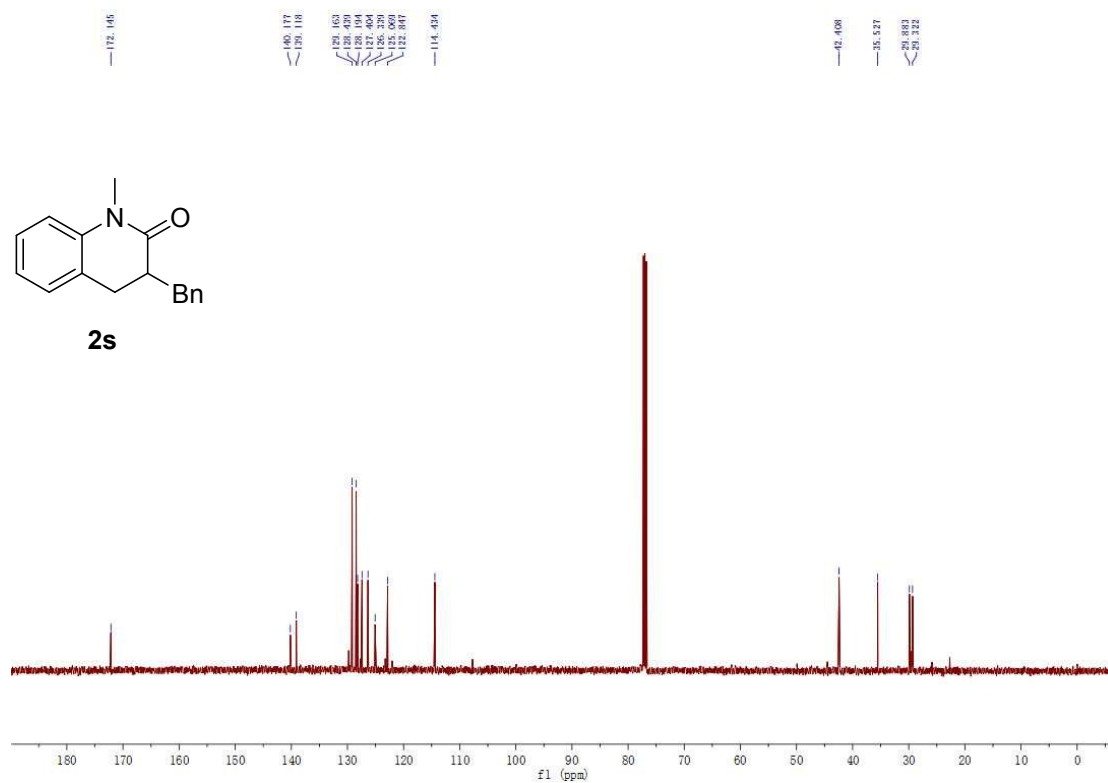

**5-Chloro-1,3-dimethyl-3-((4,4,5,5-tetramethyl-1,3,2-dioxaborolan-2-yl)methyl)indolin-2-one  
(3a)**

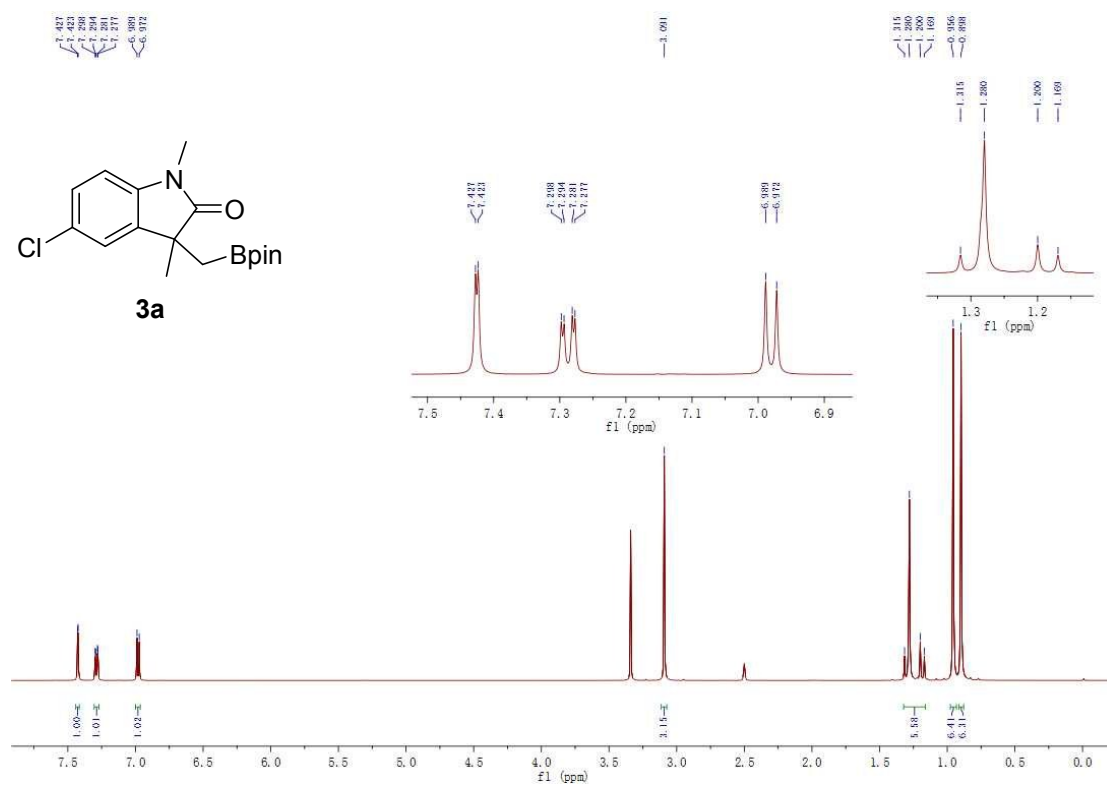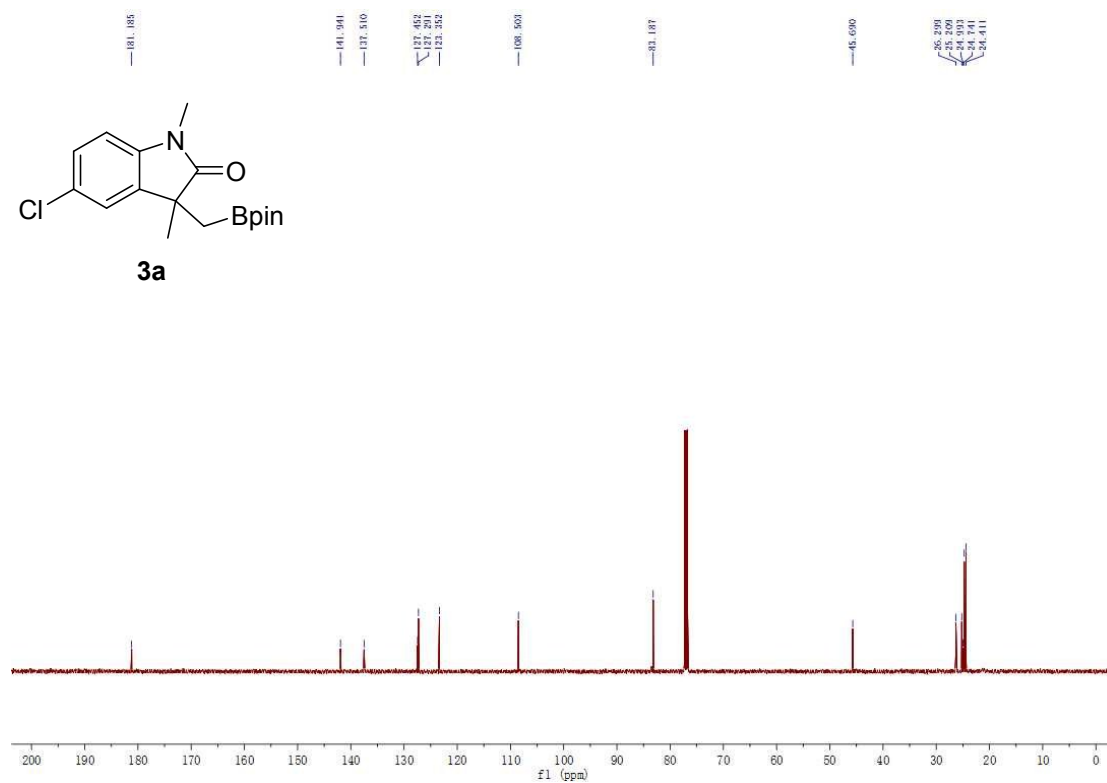

# 5-Chloro-1,3,3-trimethylindolin-2-one (4a)

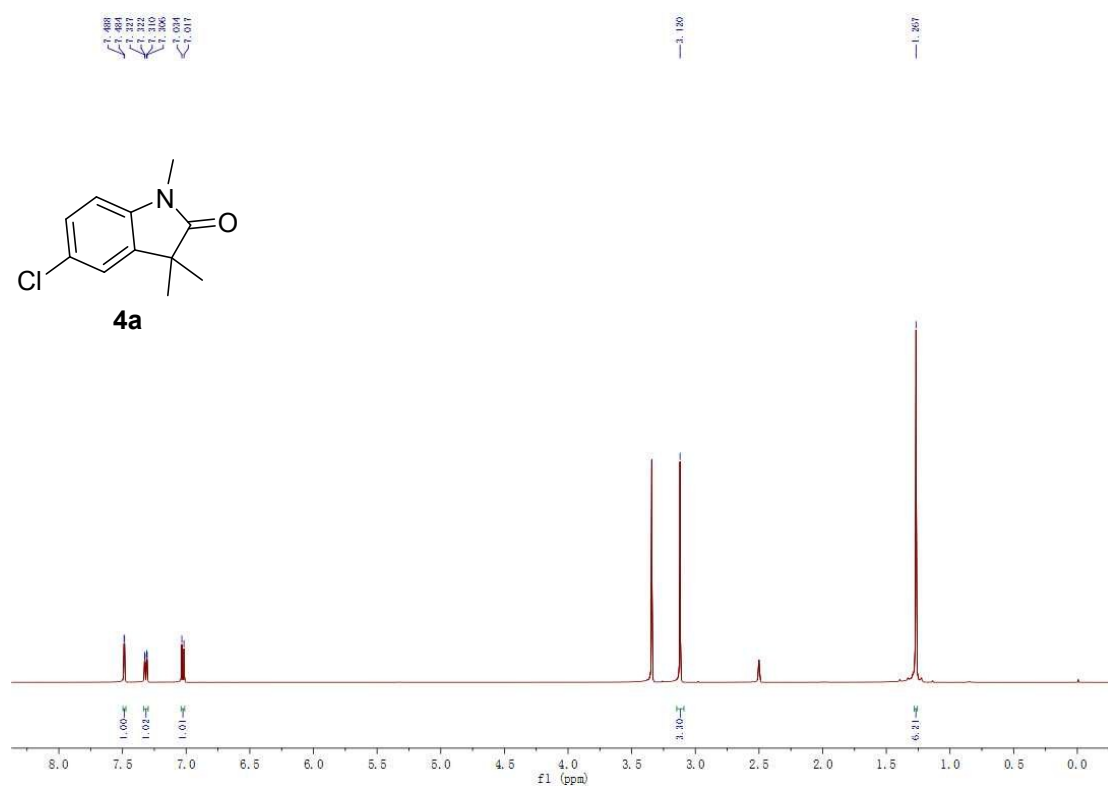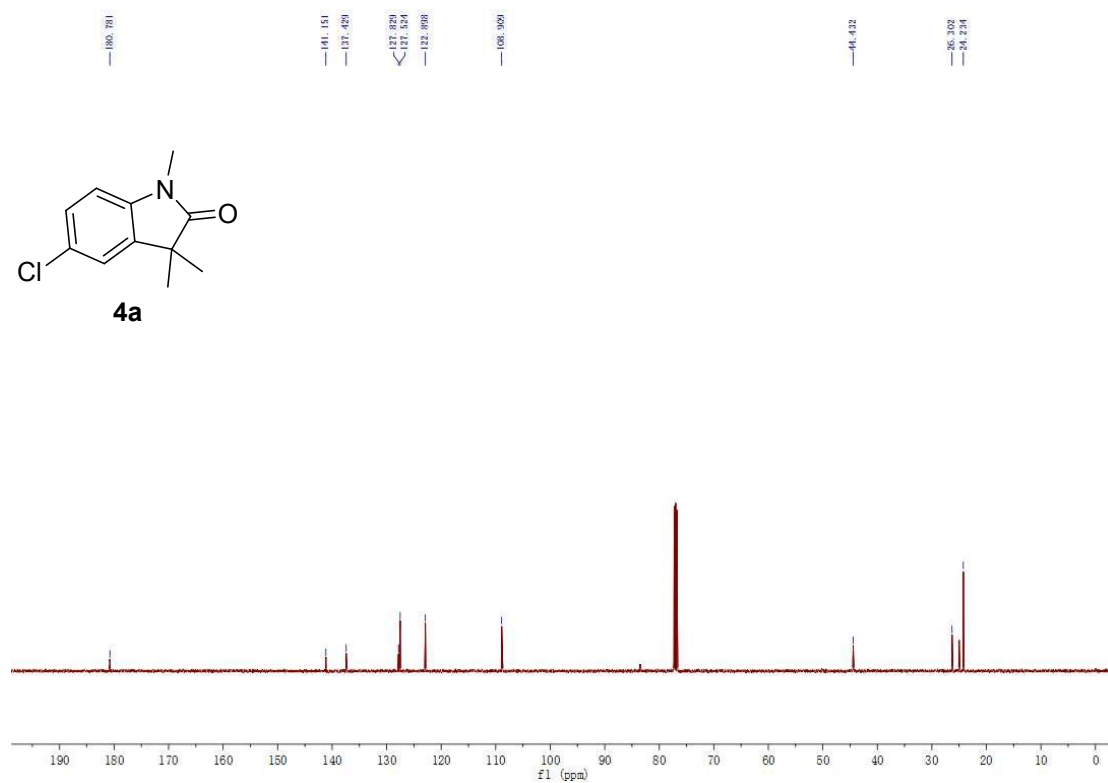

***N*-(2-bromo-4-chlorophenyl)-*N*,2-dimethyl-3-(4,4,5,5-tetramethyl-1,3,2-dioxaborolan-2-yl)propanamide (5a)**

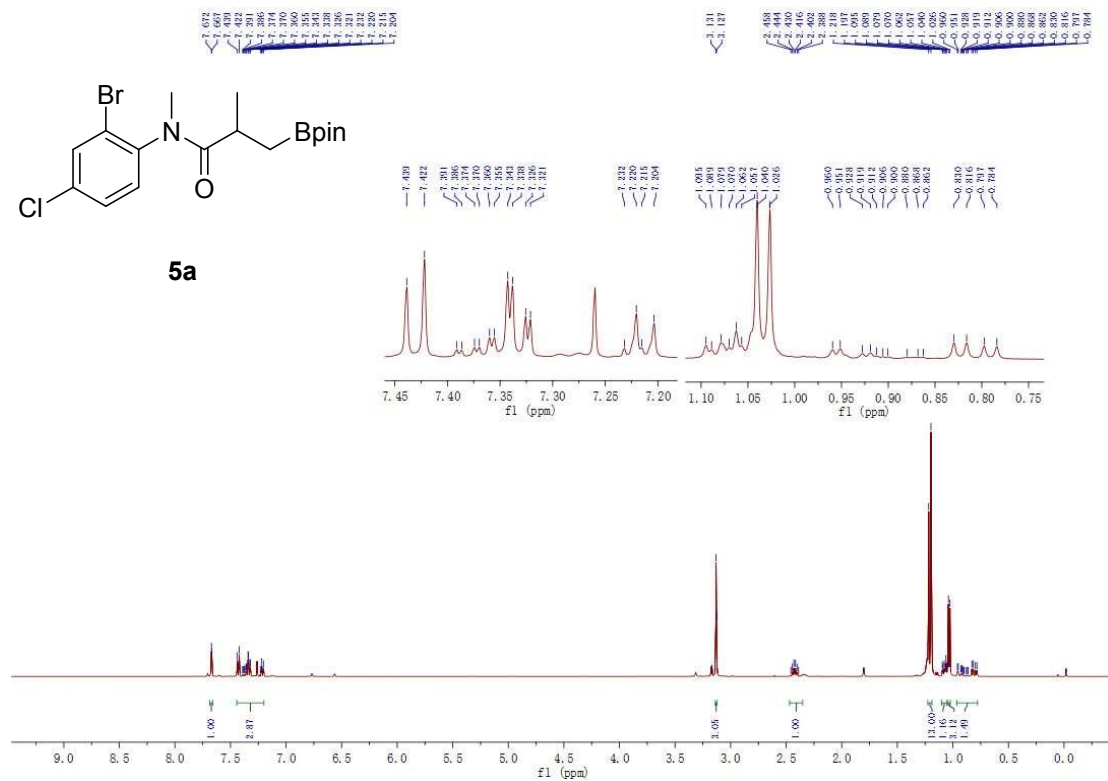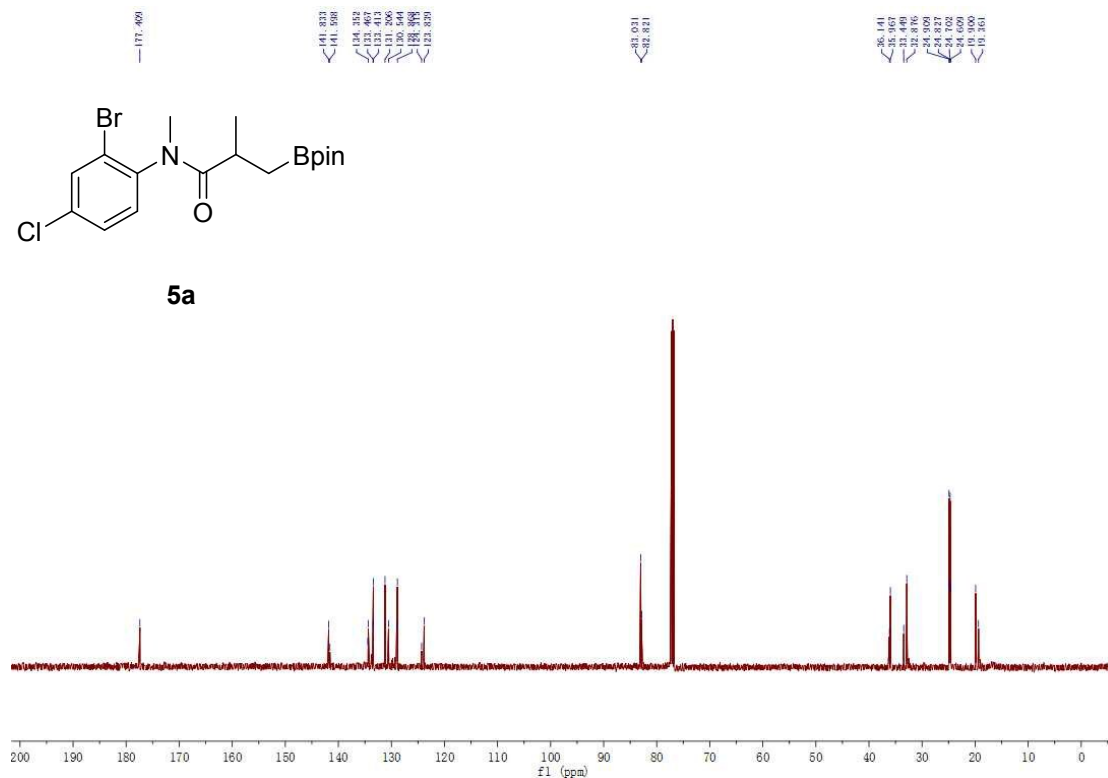

**6-chloro-1,3-dimethyl-3,4-dihydroquinolin-2(1*H*)-one-3-*d* (D-2a)**

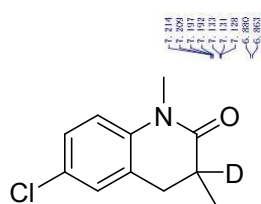

**D-2a**

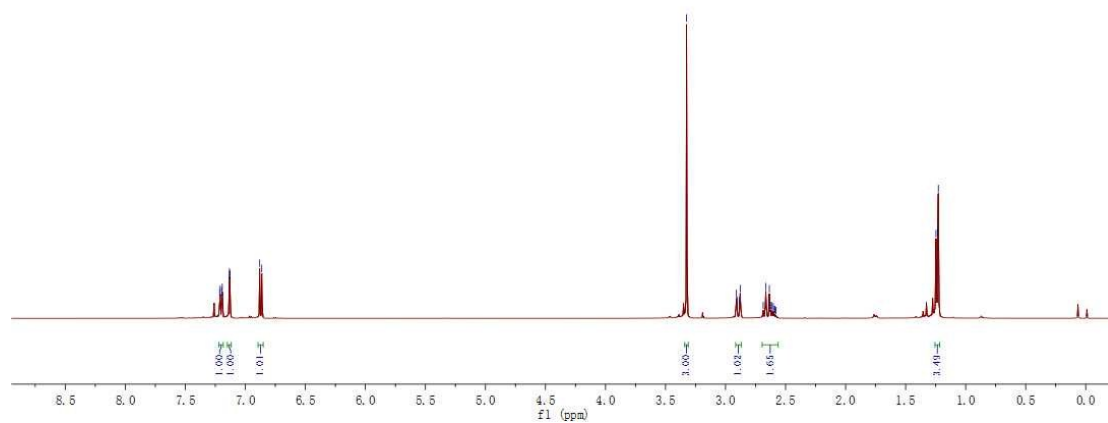

**6-Chloro-1,3-dimethylquinolin-2(1*H*)-one (6a)**

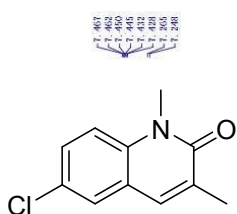

**6a**

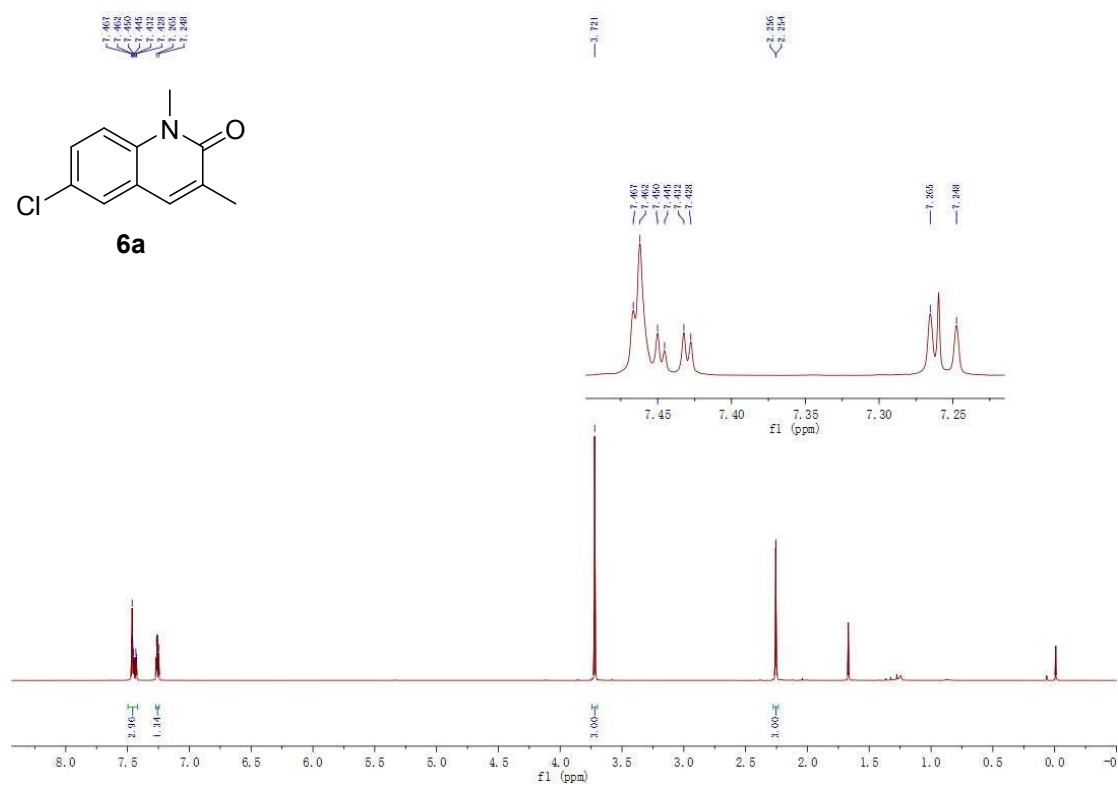



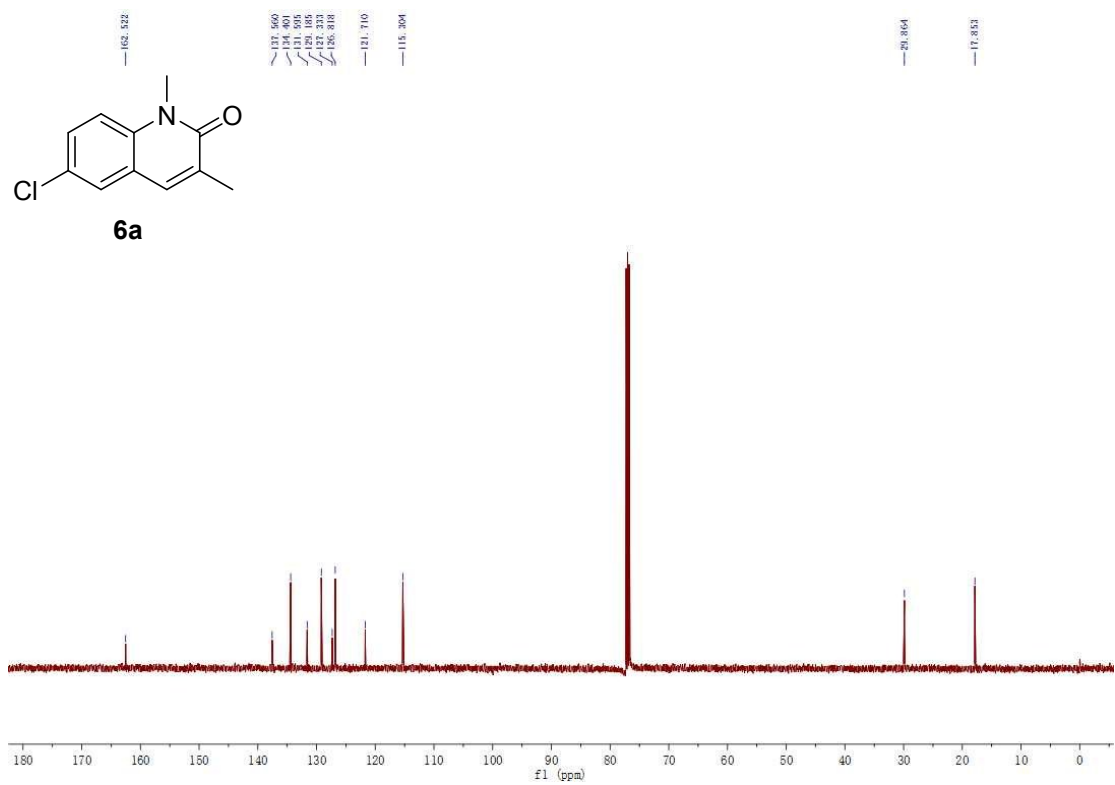

## 7. References

1. T. Nishio, H. Asai and T. Miyazaki, *Helvetica Chimica Acta.*, 2000, **83**, 1475.
2. Y. Chen, A. Turlik and T. R. Newhouse, *J. Am. Chem. Soc.*, 2016, **138**, 1166–1169.
3. Y. Kim and S. Chang, *Angew. Chem. Int. Ed.*, 2016, **55**, 218 –222.
4. F. Wei, L. Wei, L. Zhou, C.-H. Tung, Y. Ma and Z. Xu, *Asian J. Org. Chem.*, 2016, **5**, 971.
5. H. Chea, H.-S. Sim and J. Yuna, *Adv. Synth. Catal.*, 2009, **351**, 855 – 858.
6. D. H. R. Barton and D.W. Jones, *J. Chem. Soc.*, **1965**, 3563 – 3570.
